# Supplementary material
Source: PubMed Central journal article supplement (PMC3730822)

**HKCre<sup>ERT2</sup> (Veh)**

**Day 7**

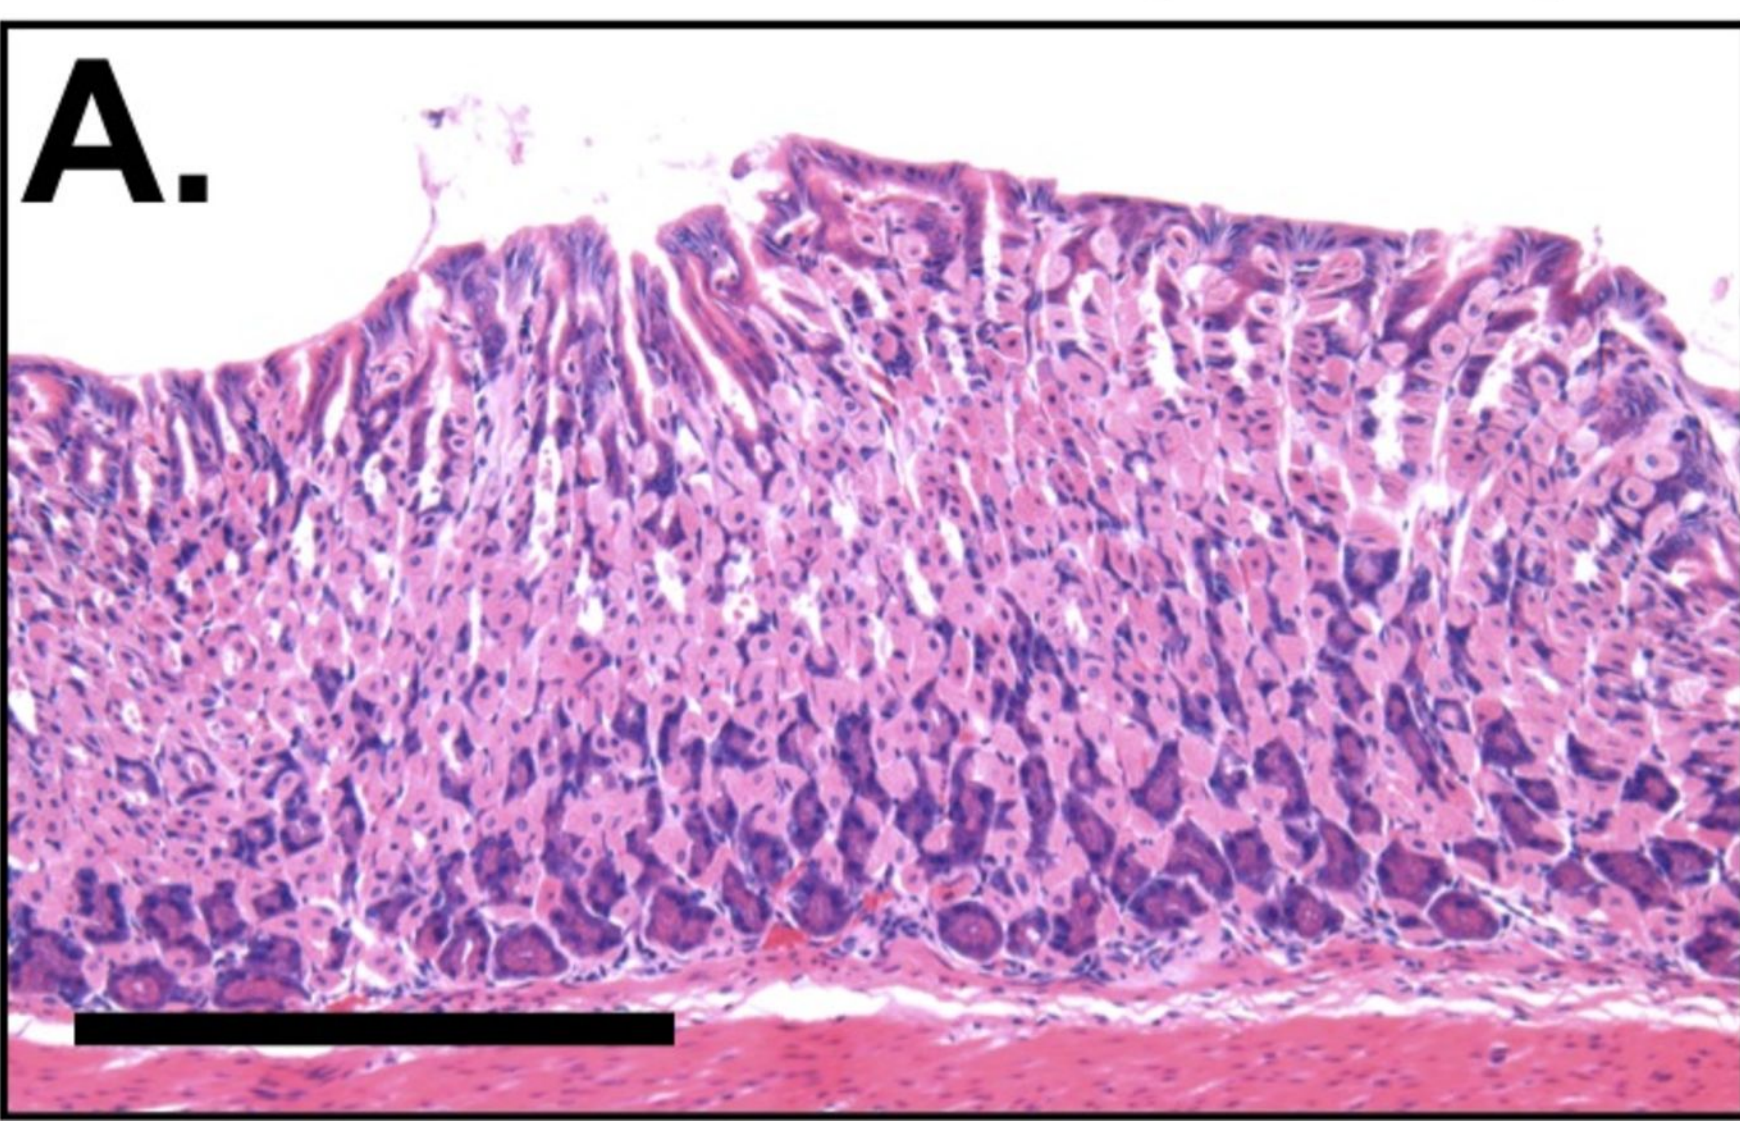

**Day 30**

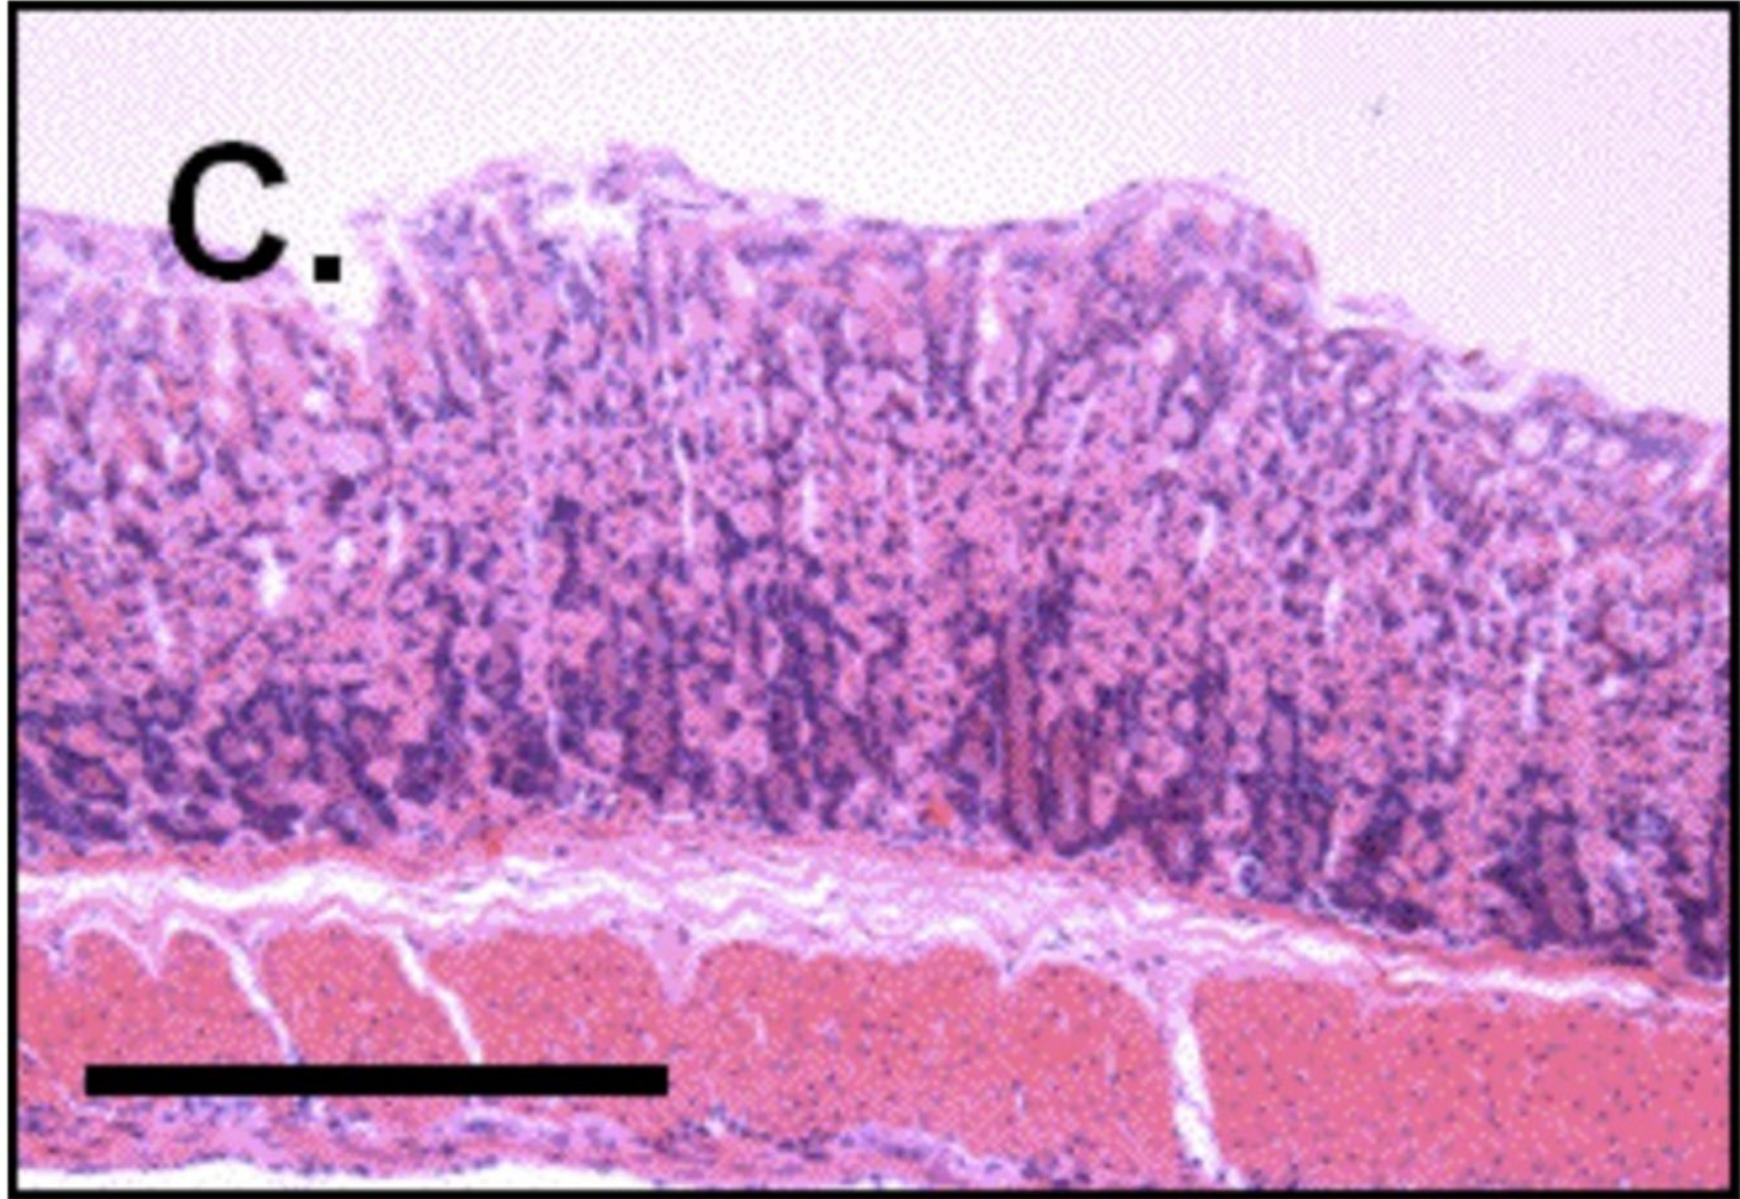

**HKCre<sup>ERT2</sup> (TX)**

**Day 7**

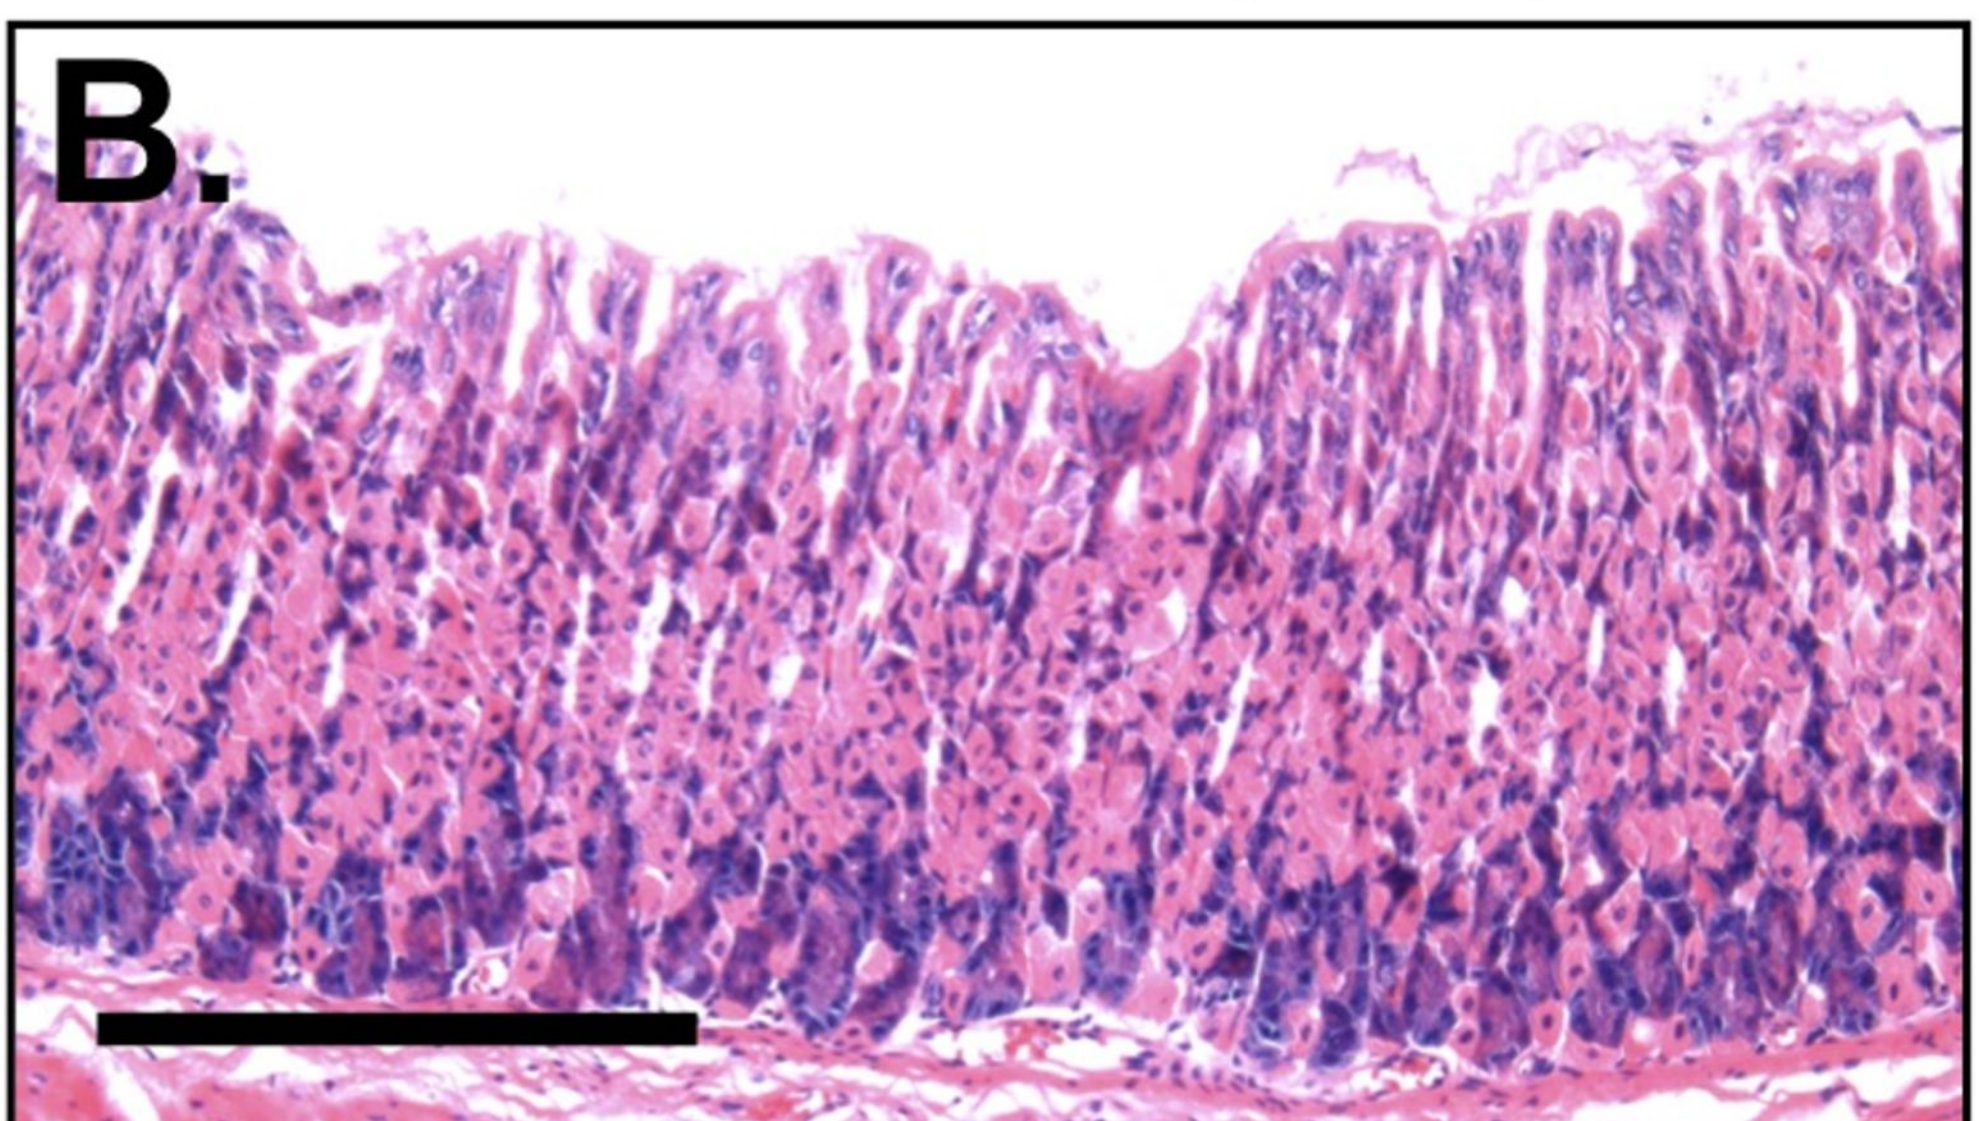

**Day 30**

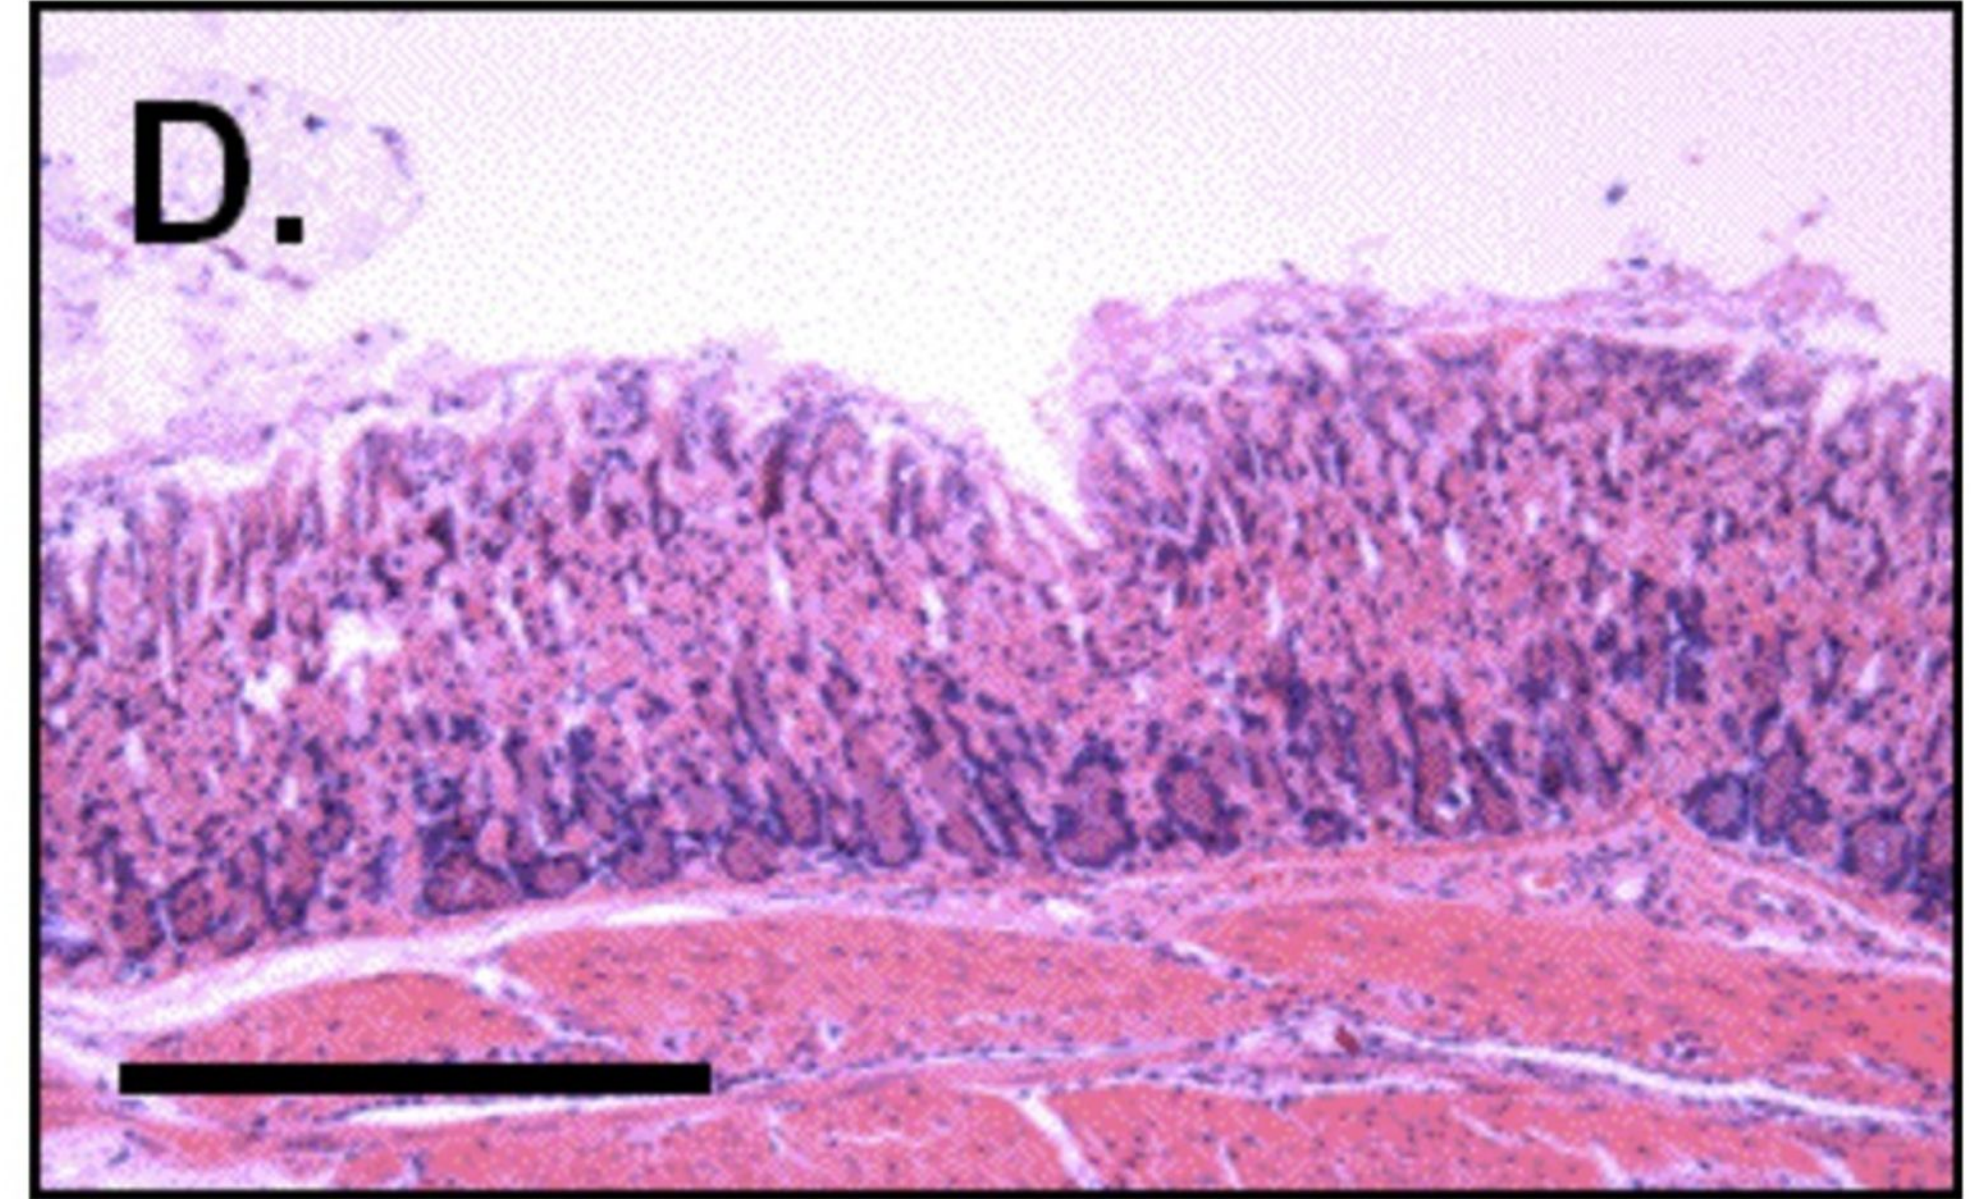

**Shhflx/flx (Veh)**

**Day 7**

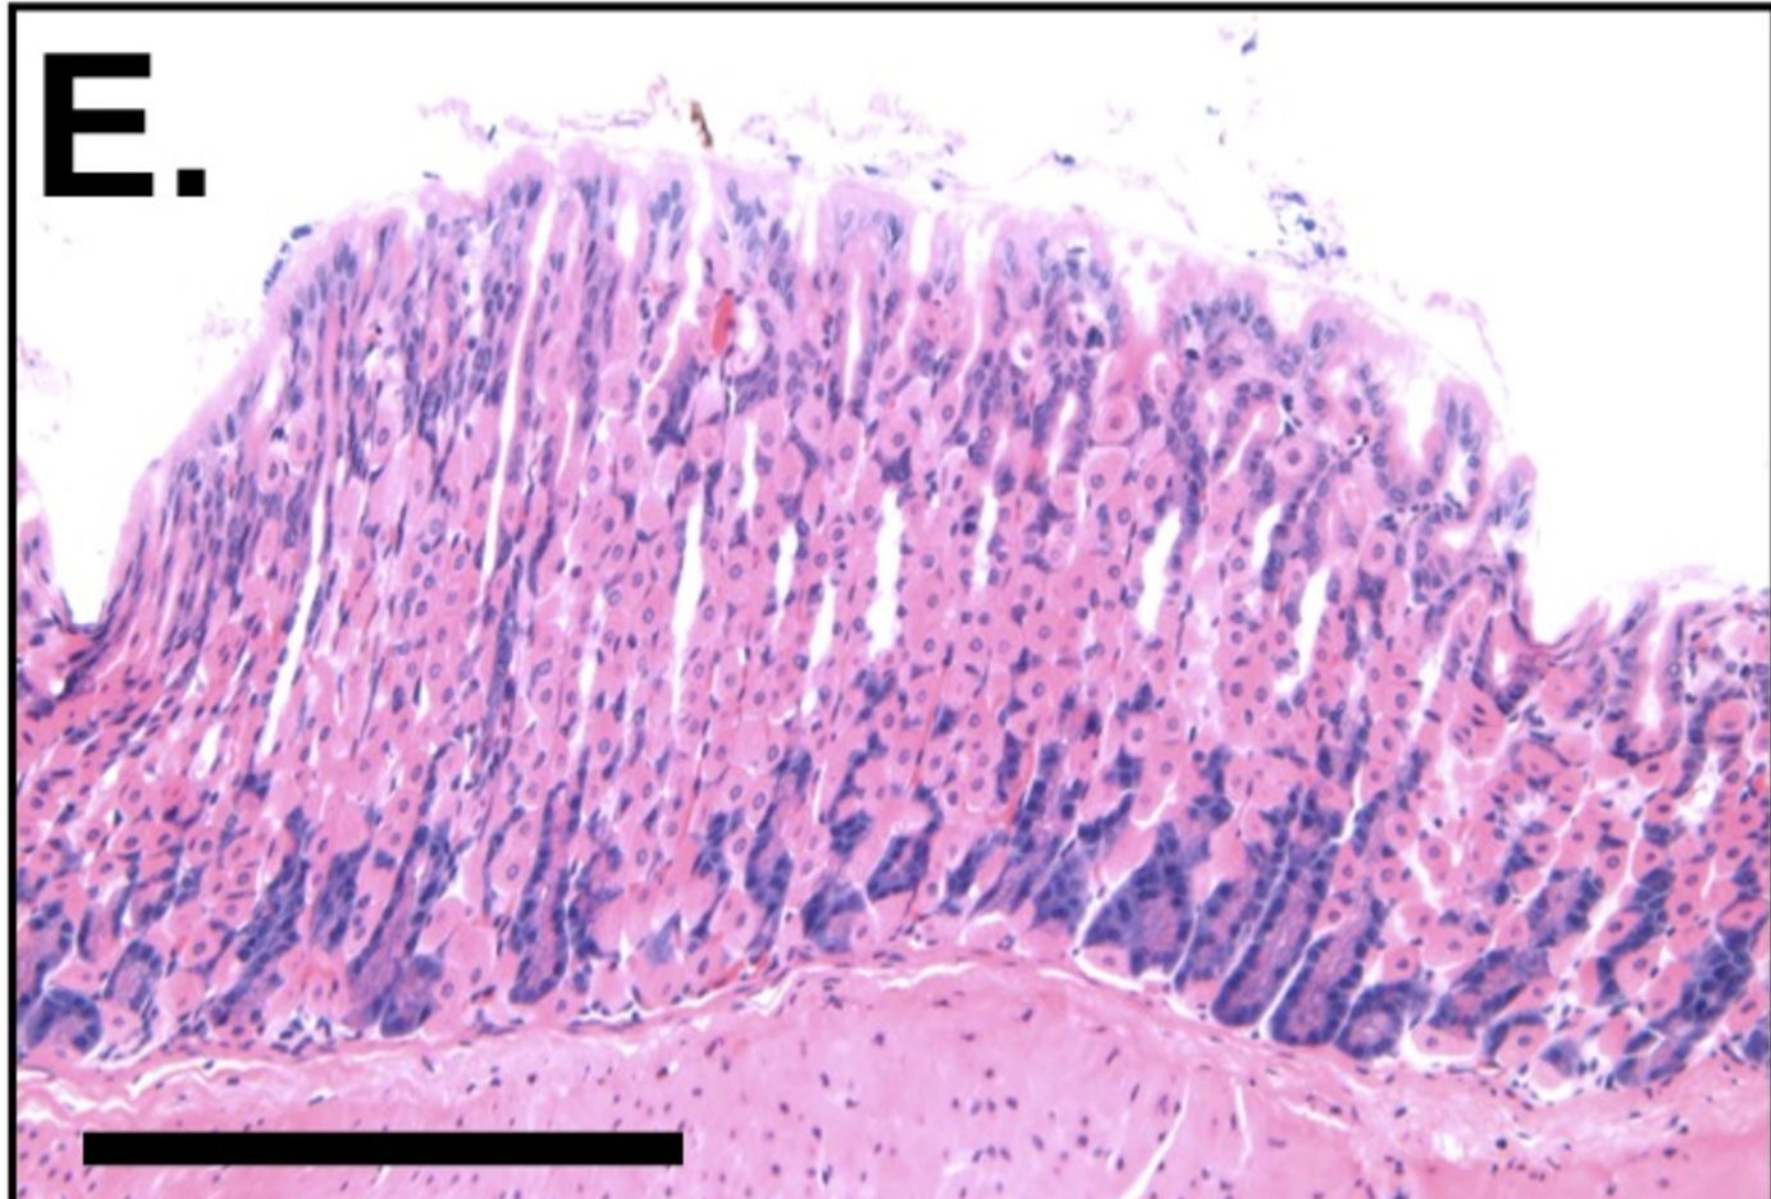

**Day 30**

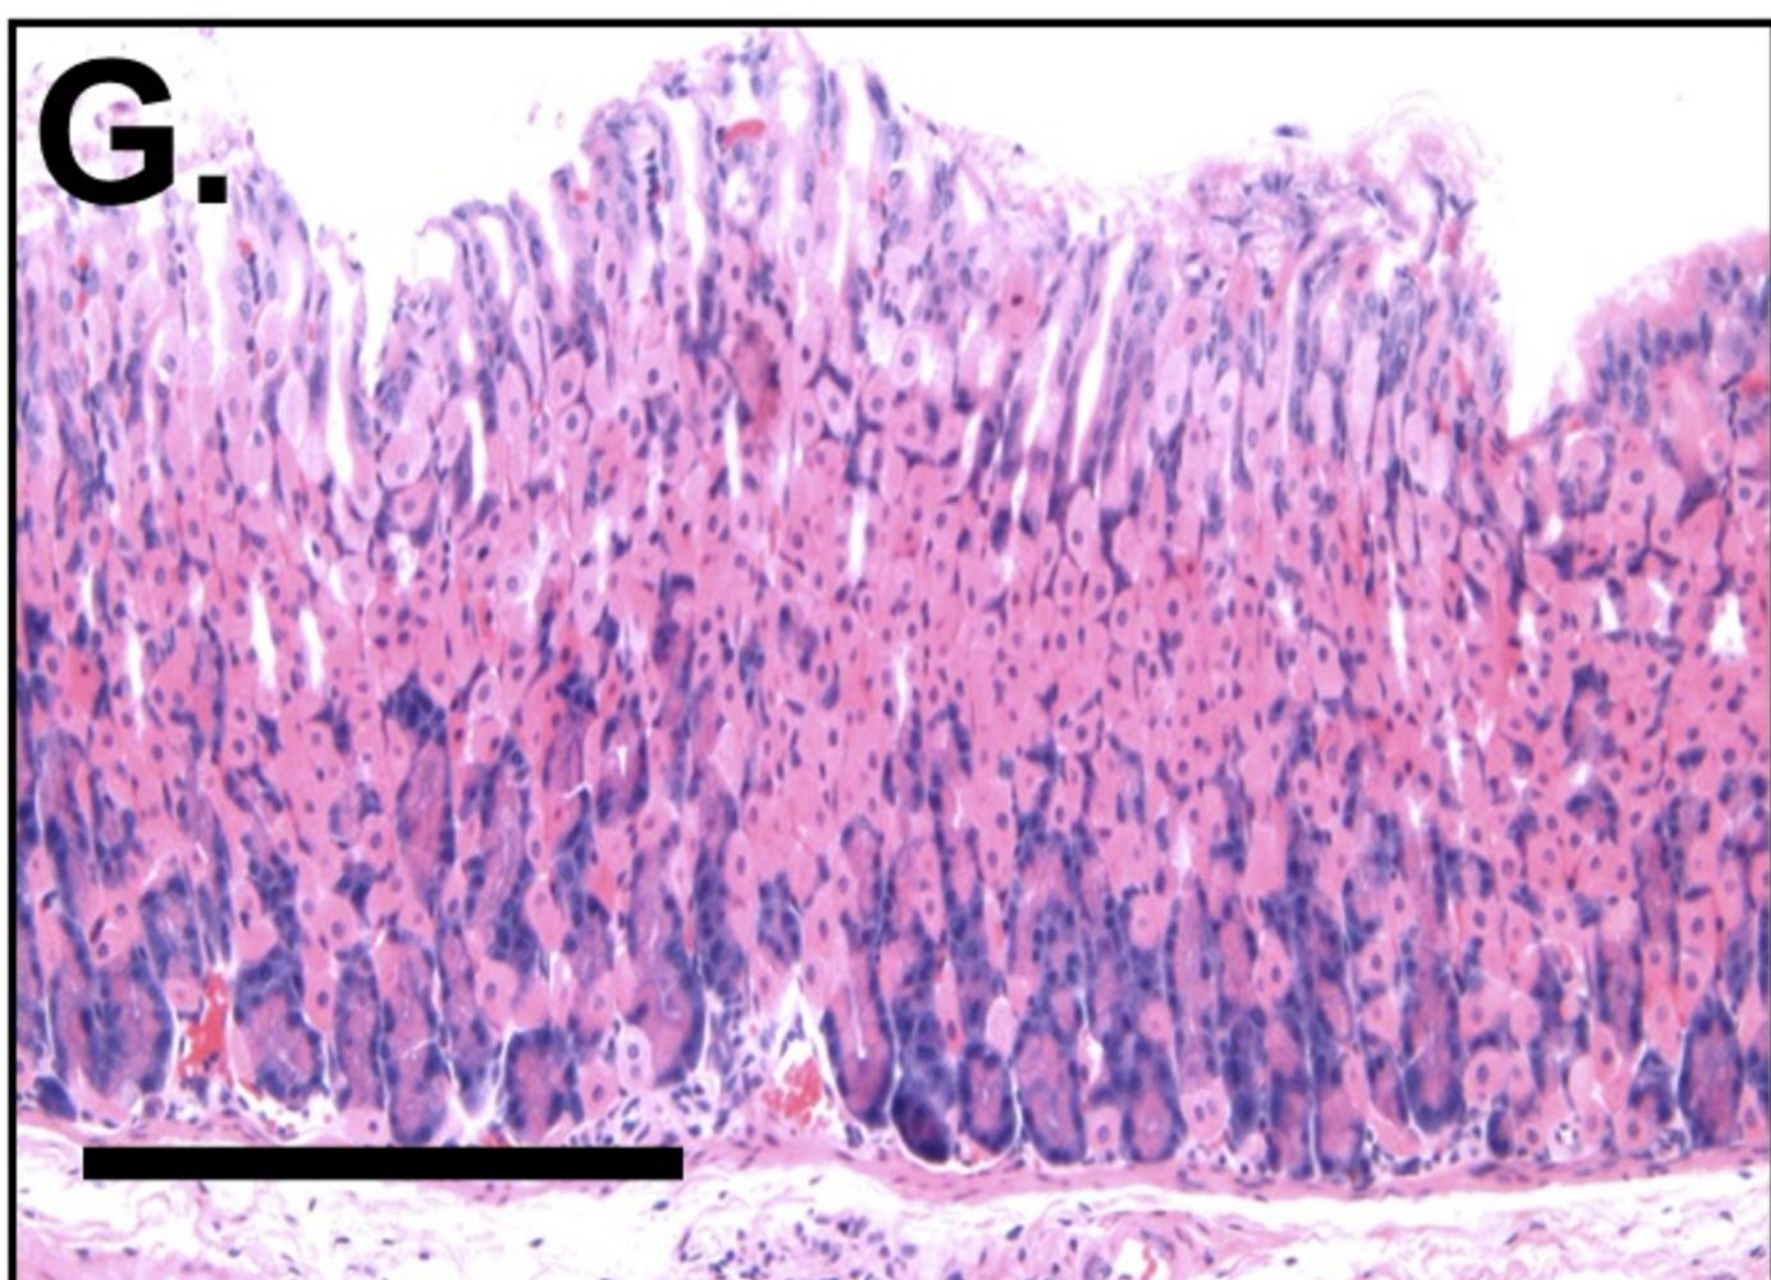

**Shhflx/flx (TX)**

**Day 7**

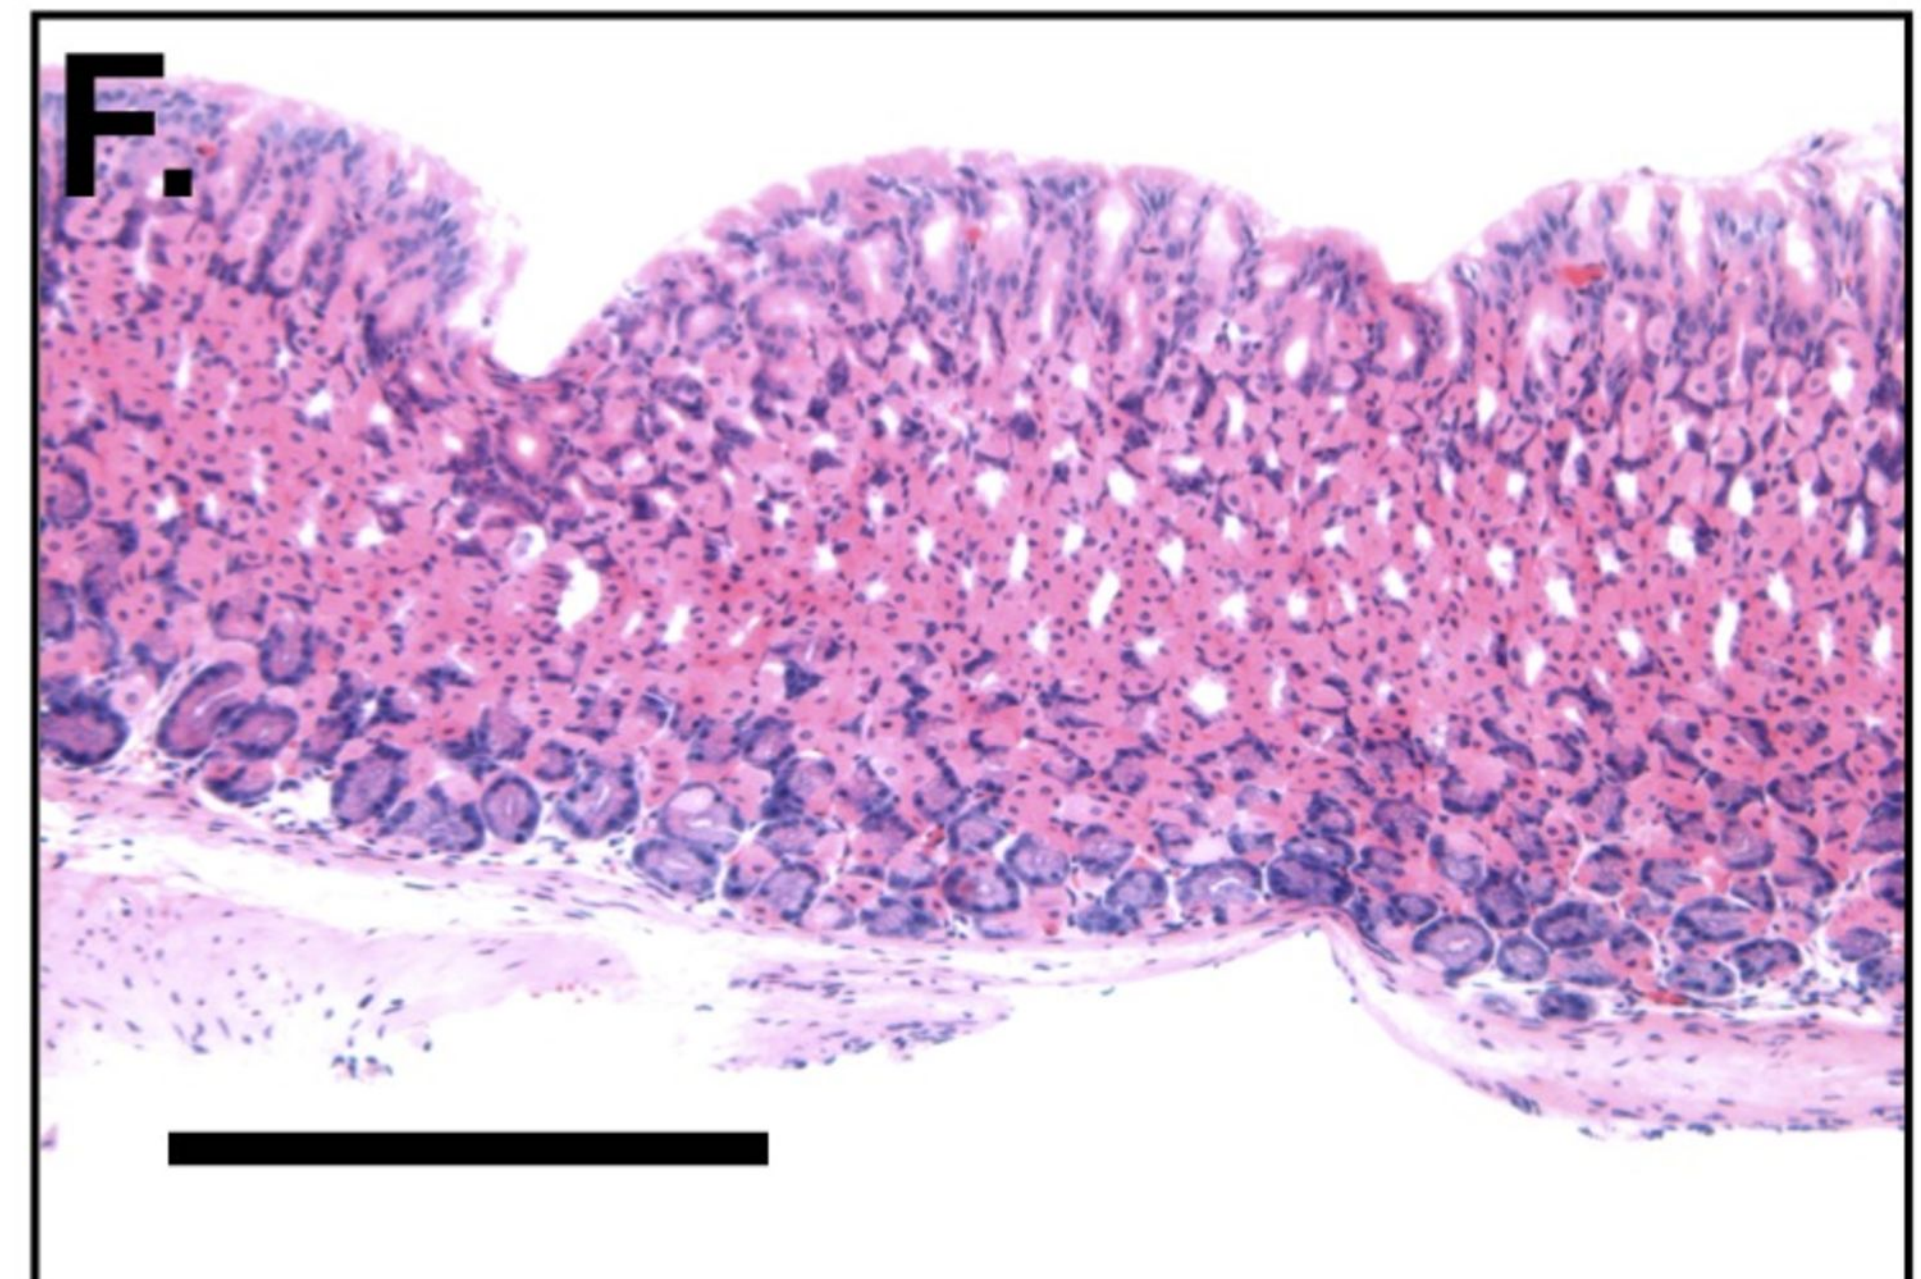

**Day 30**

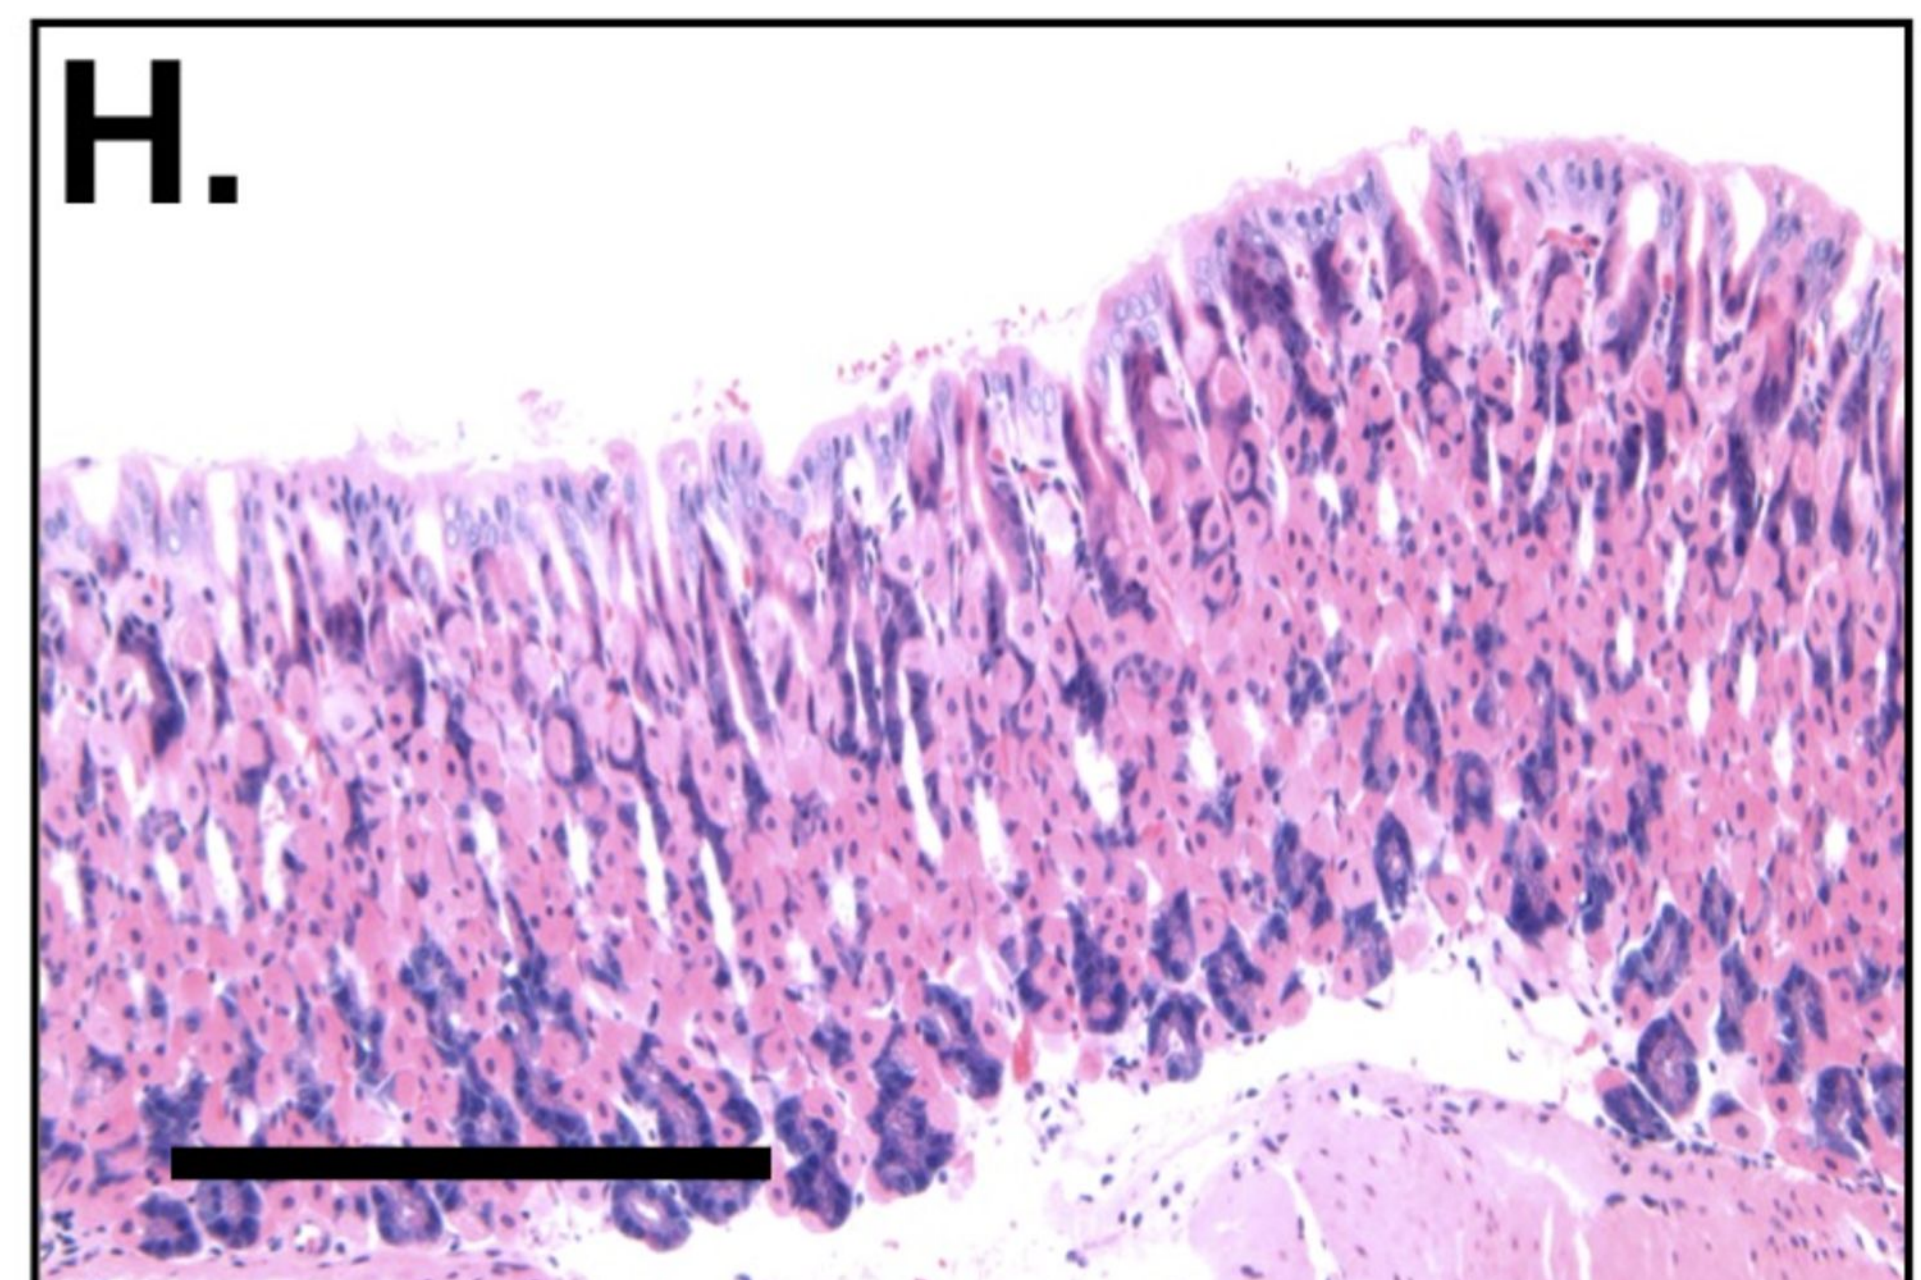

### A. control

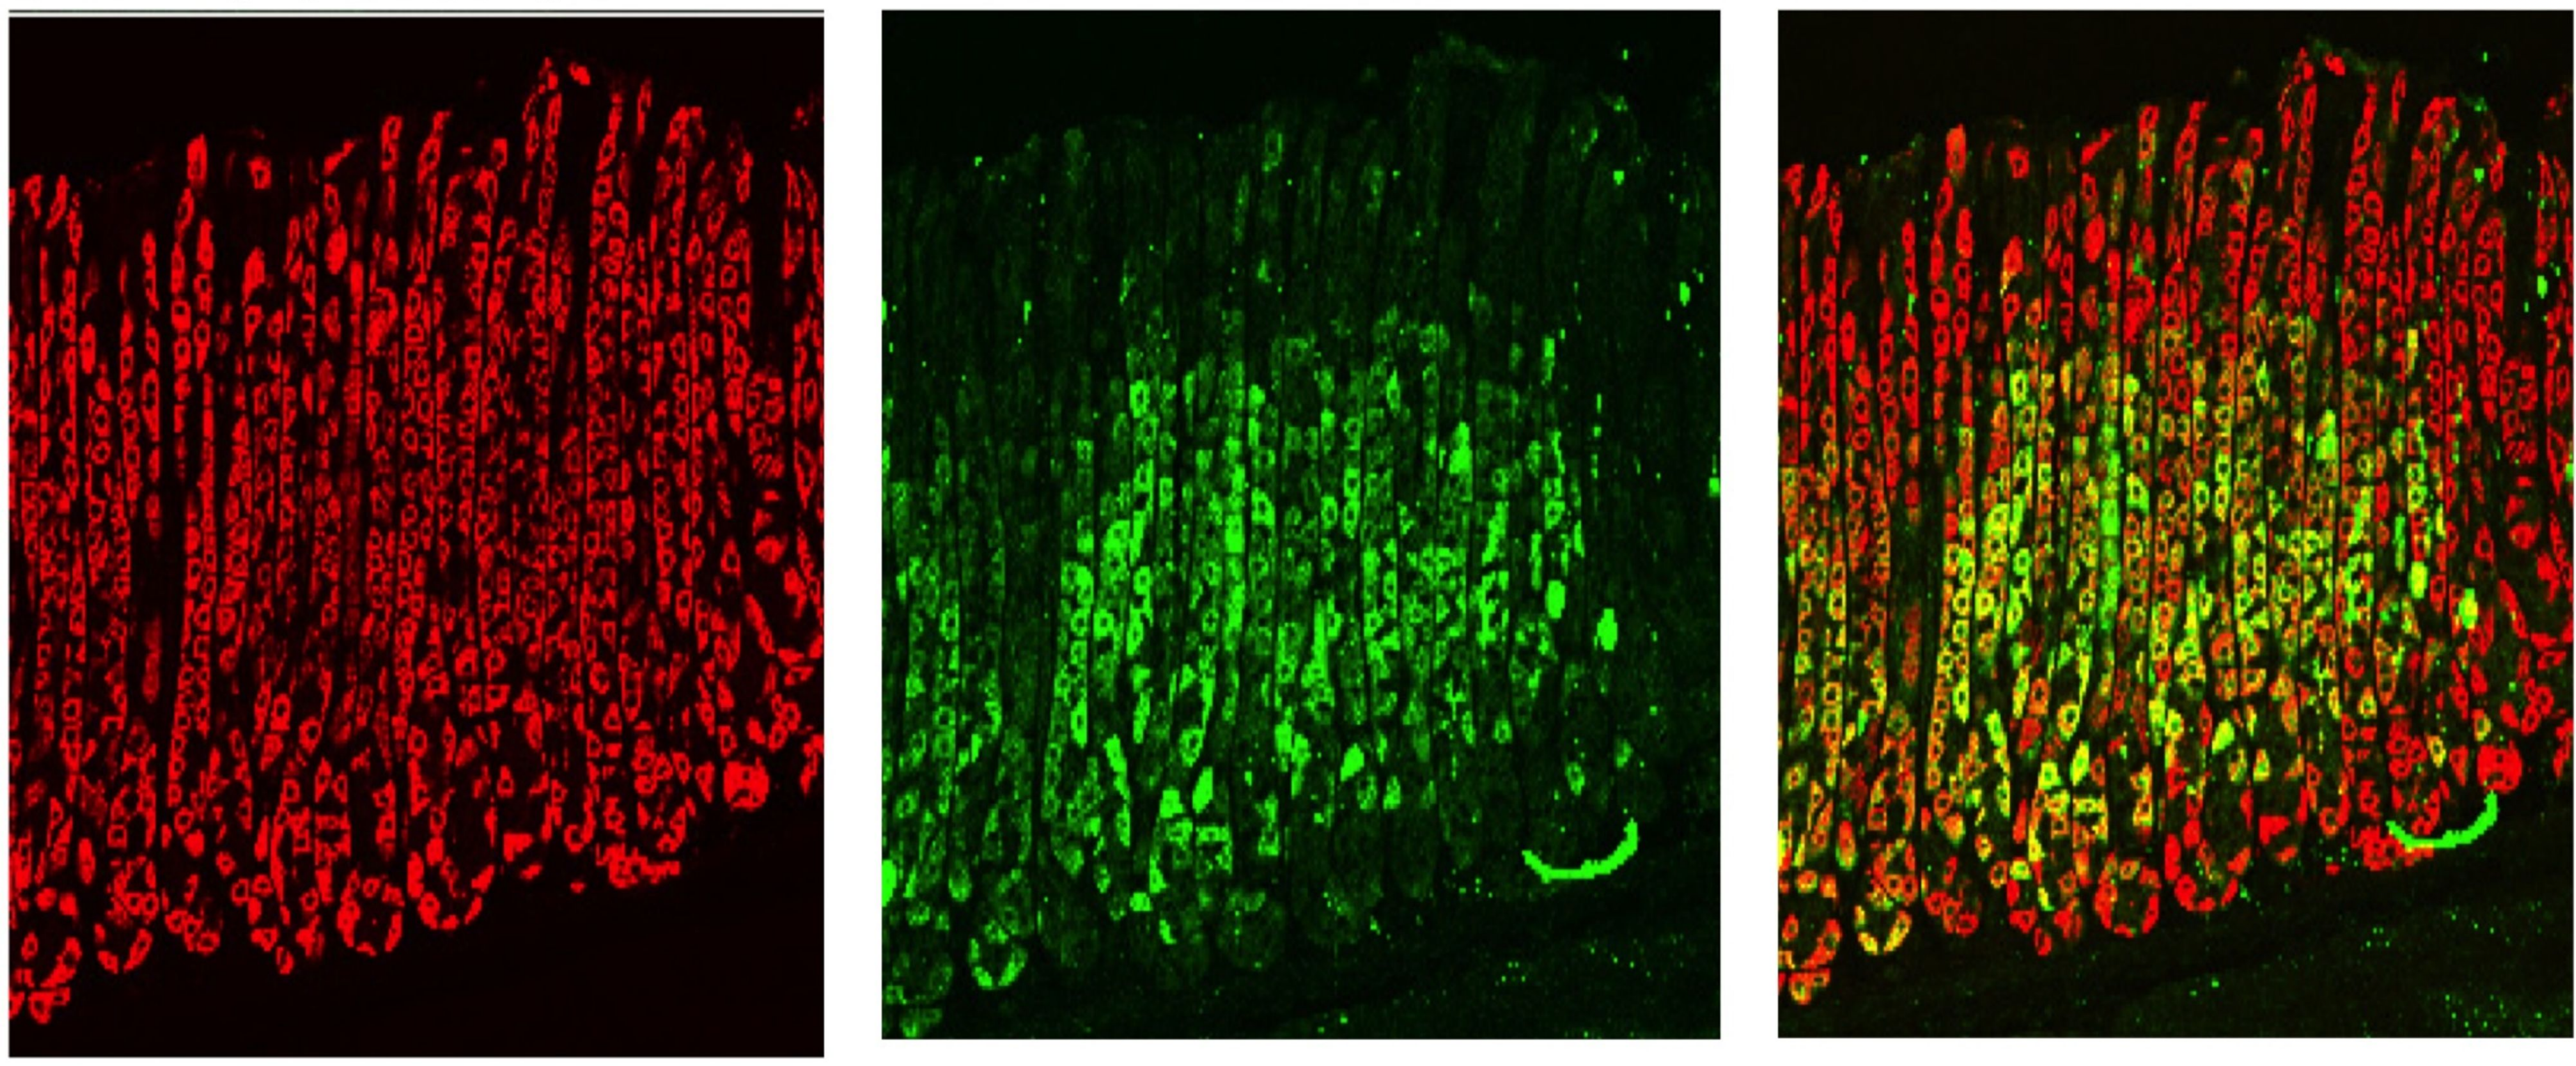

### B. PC-iShhKO

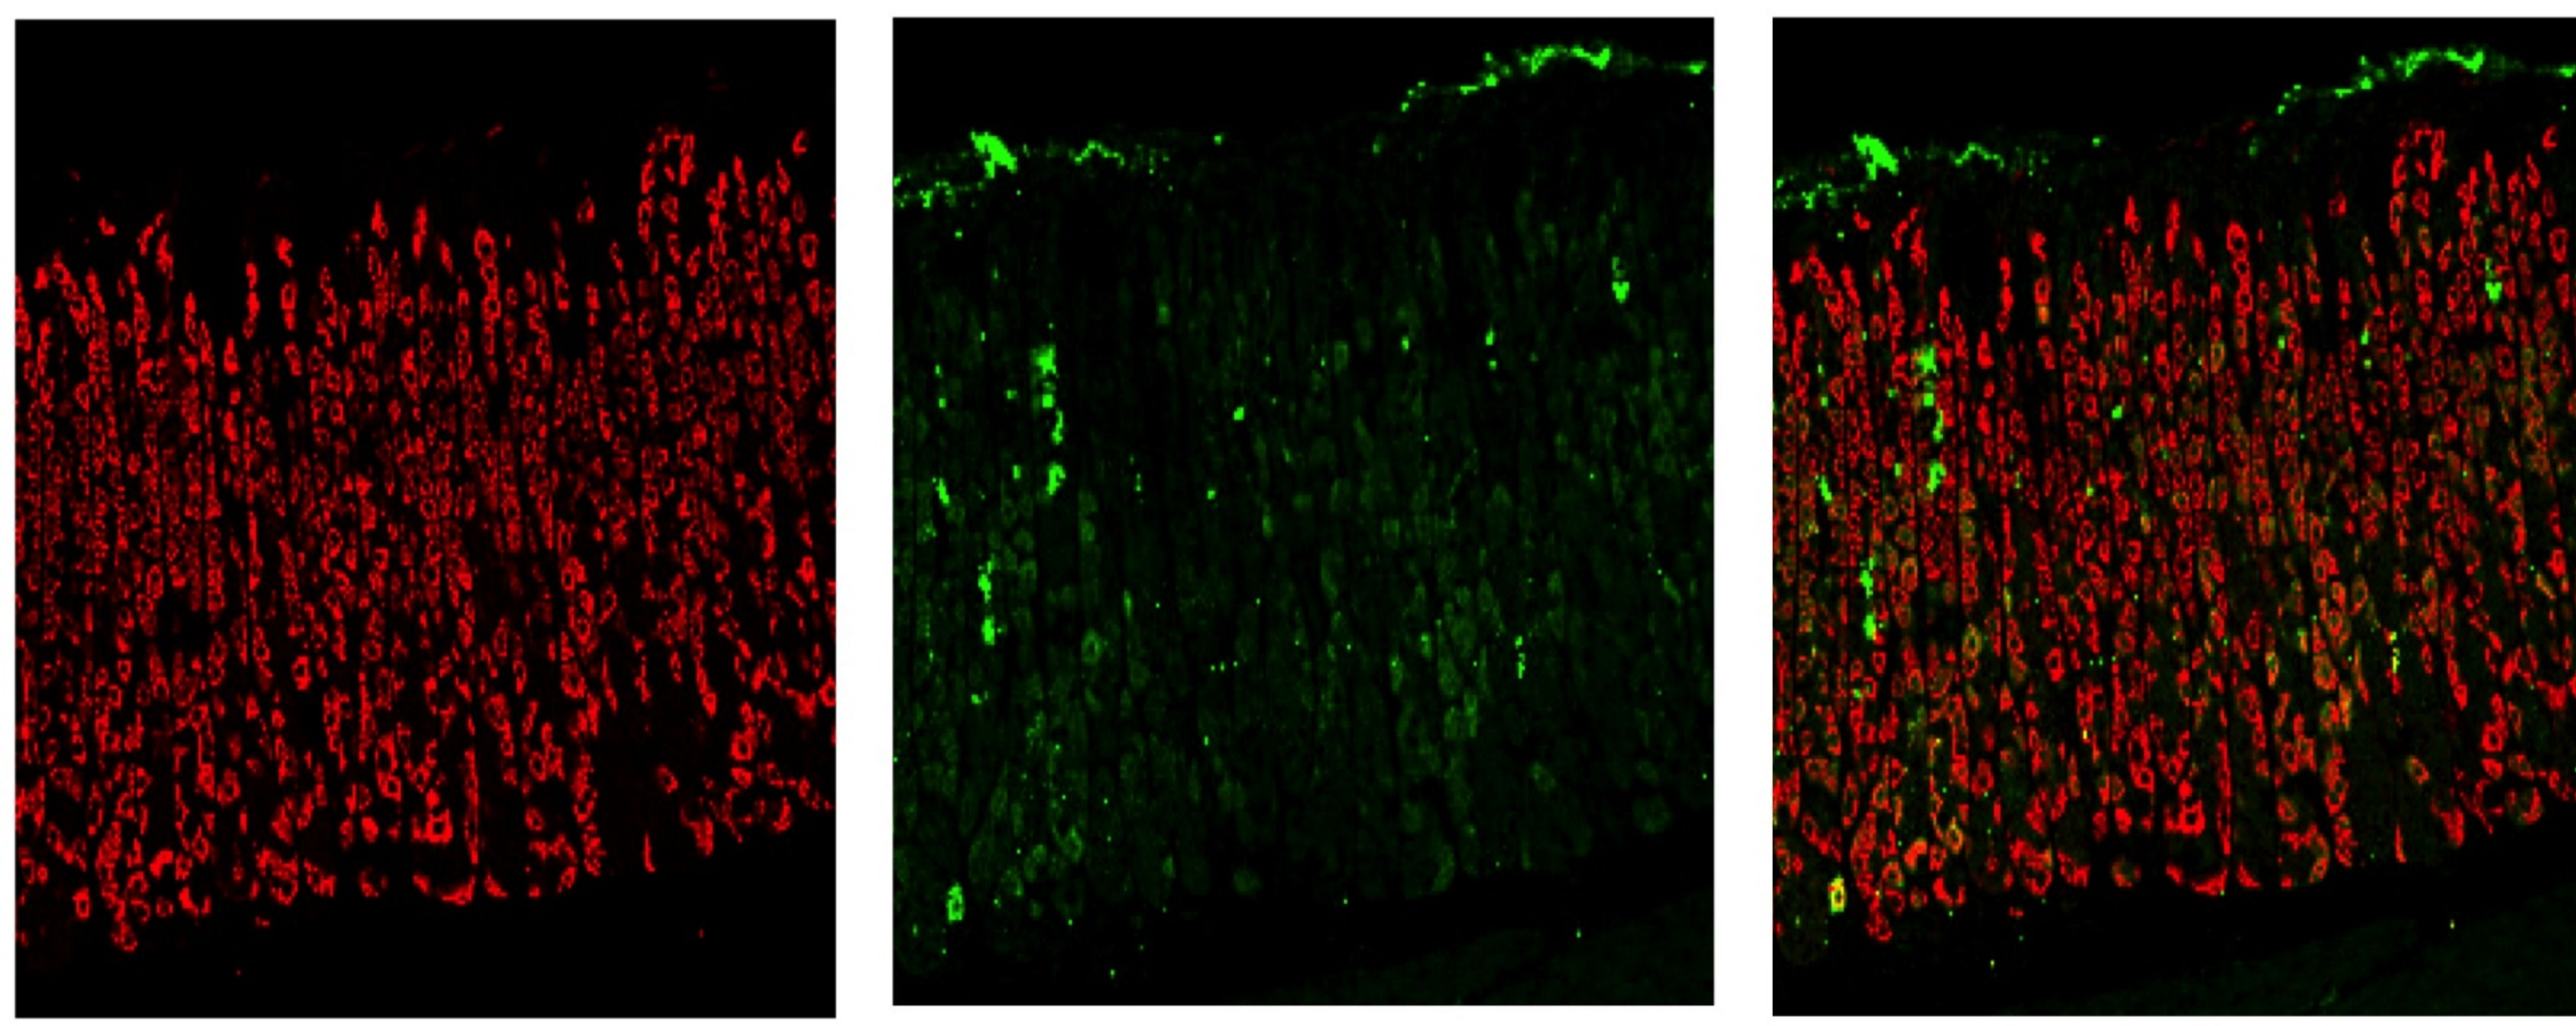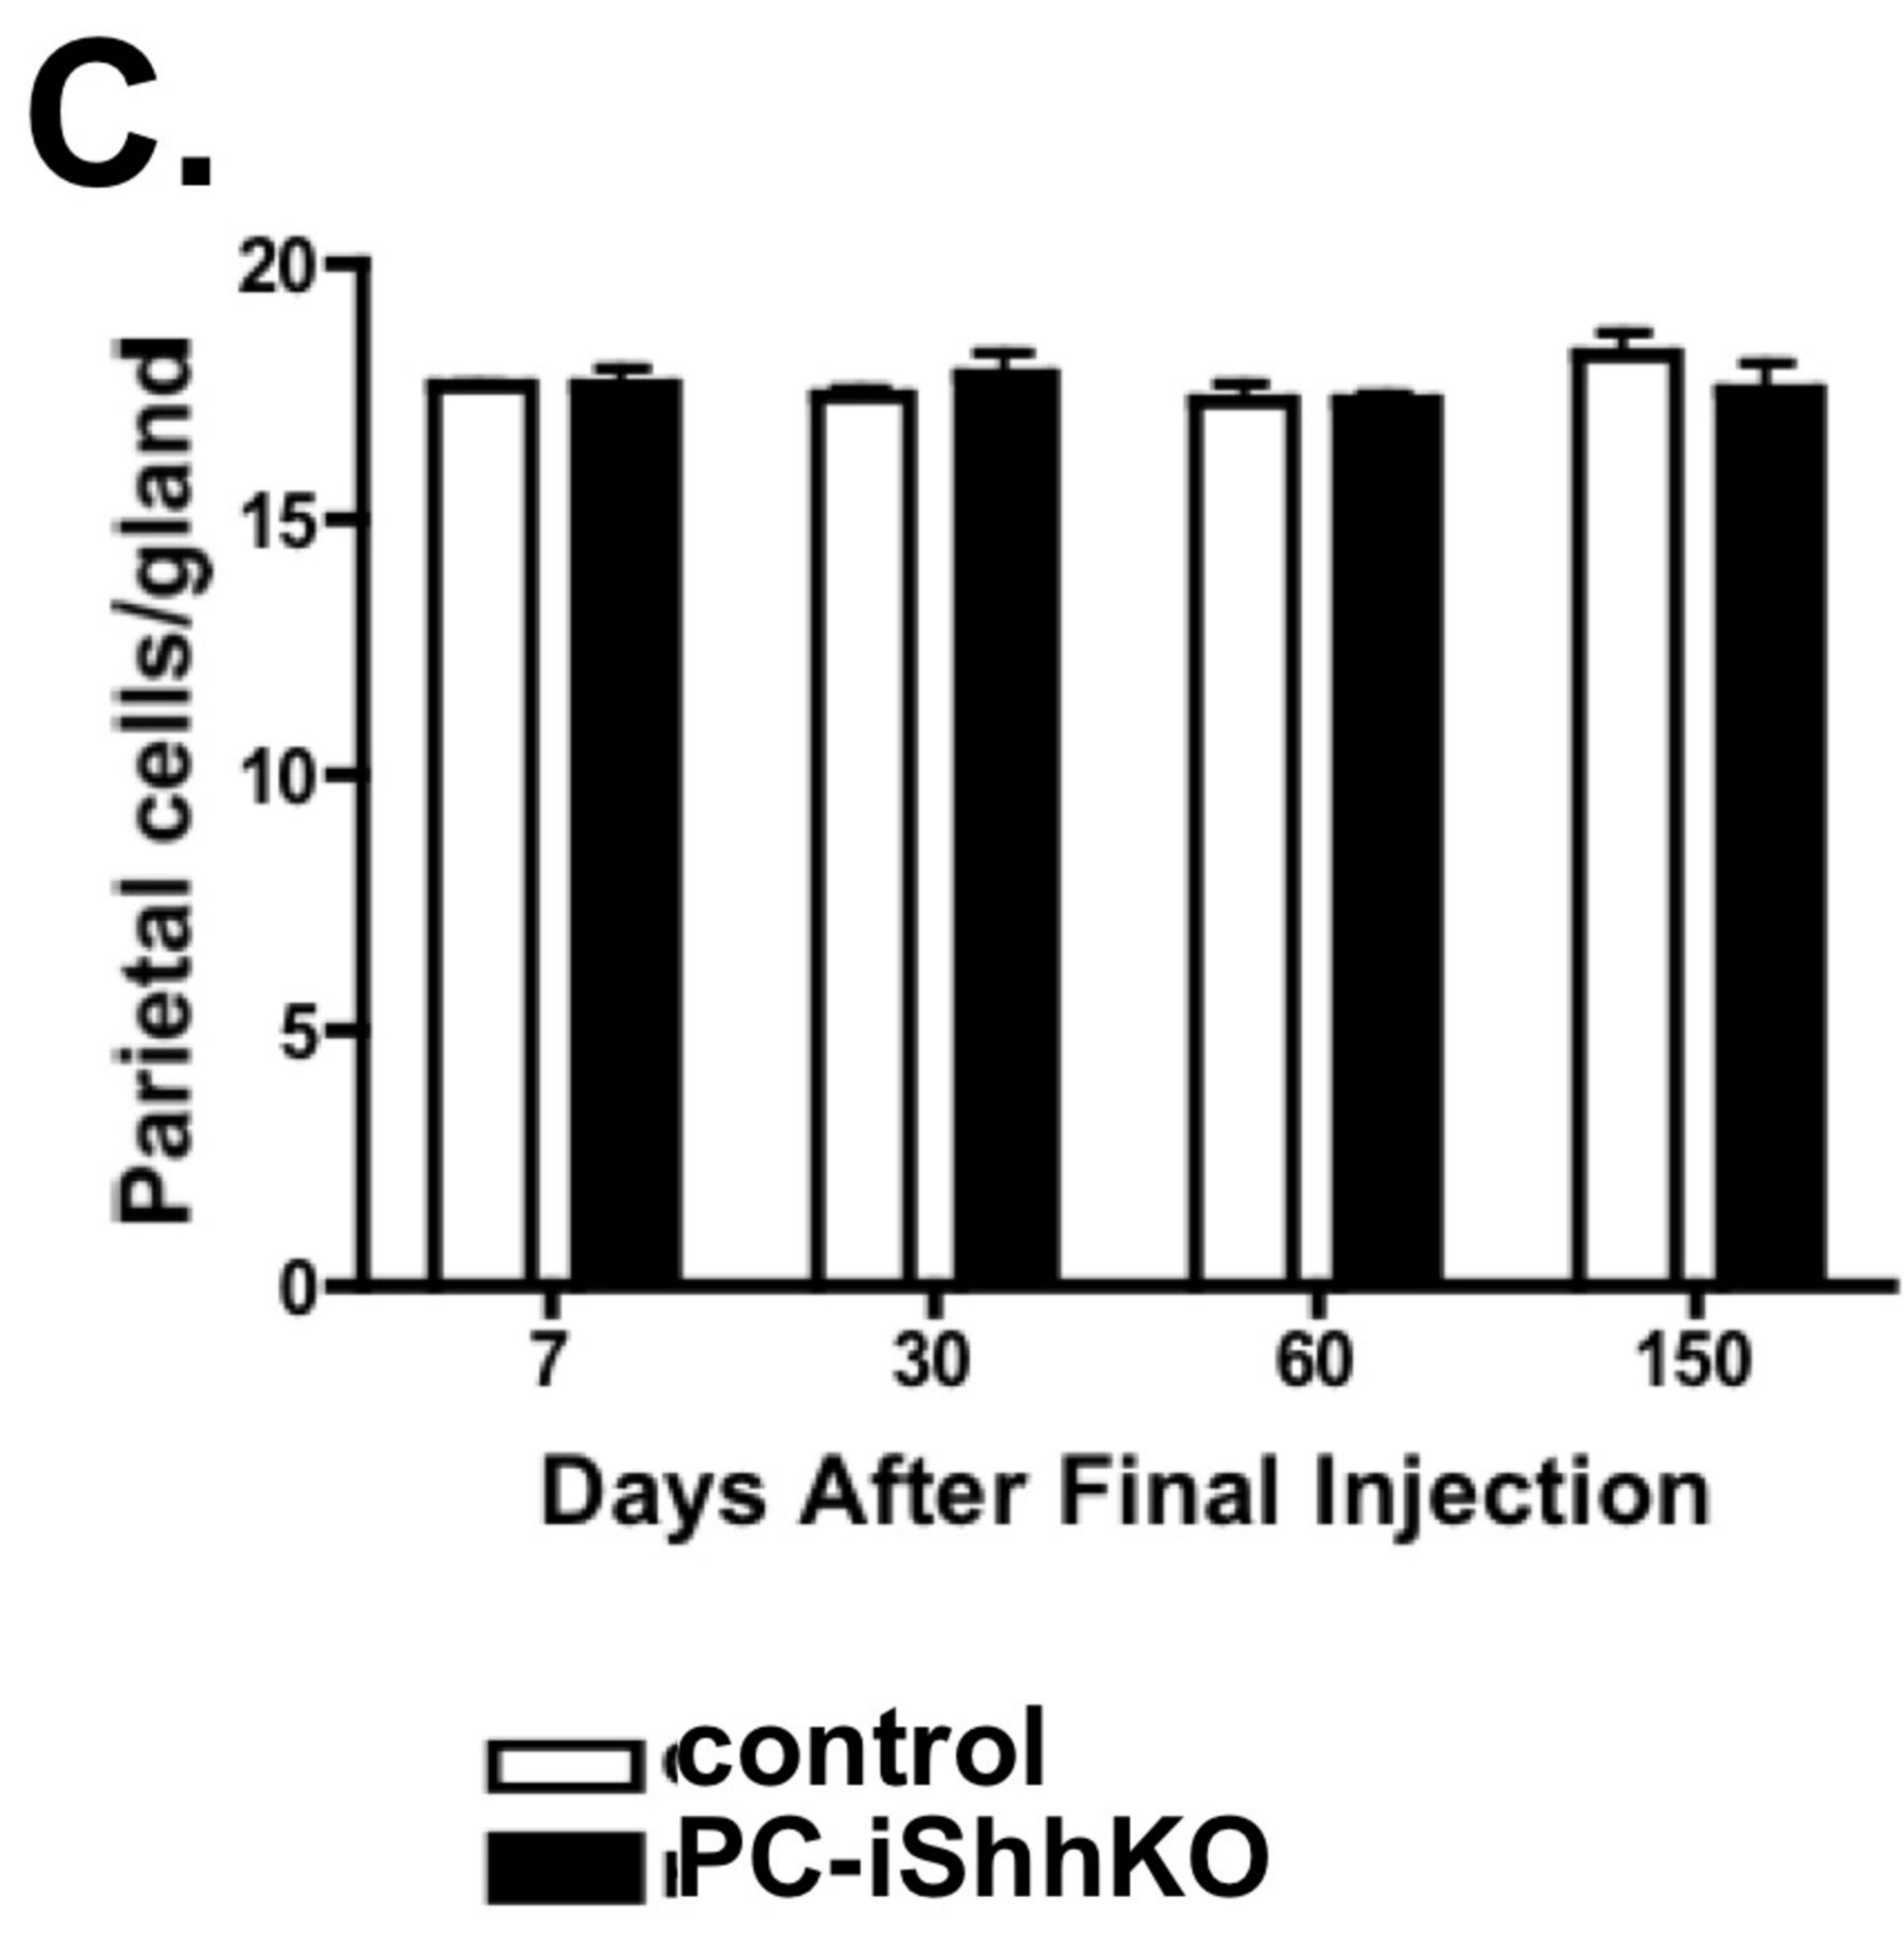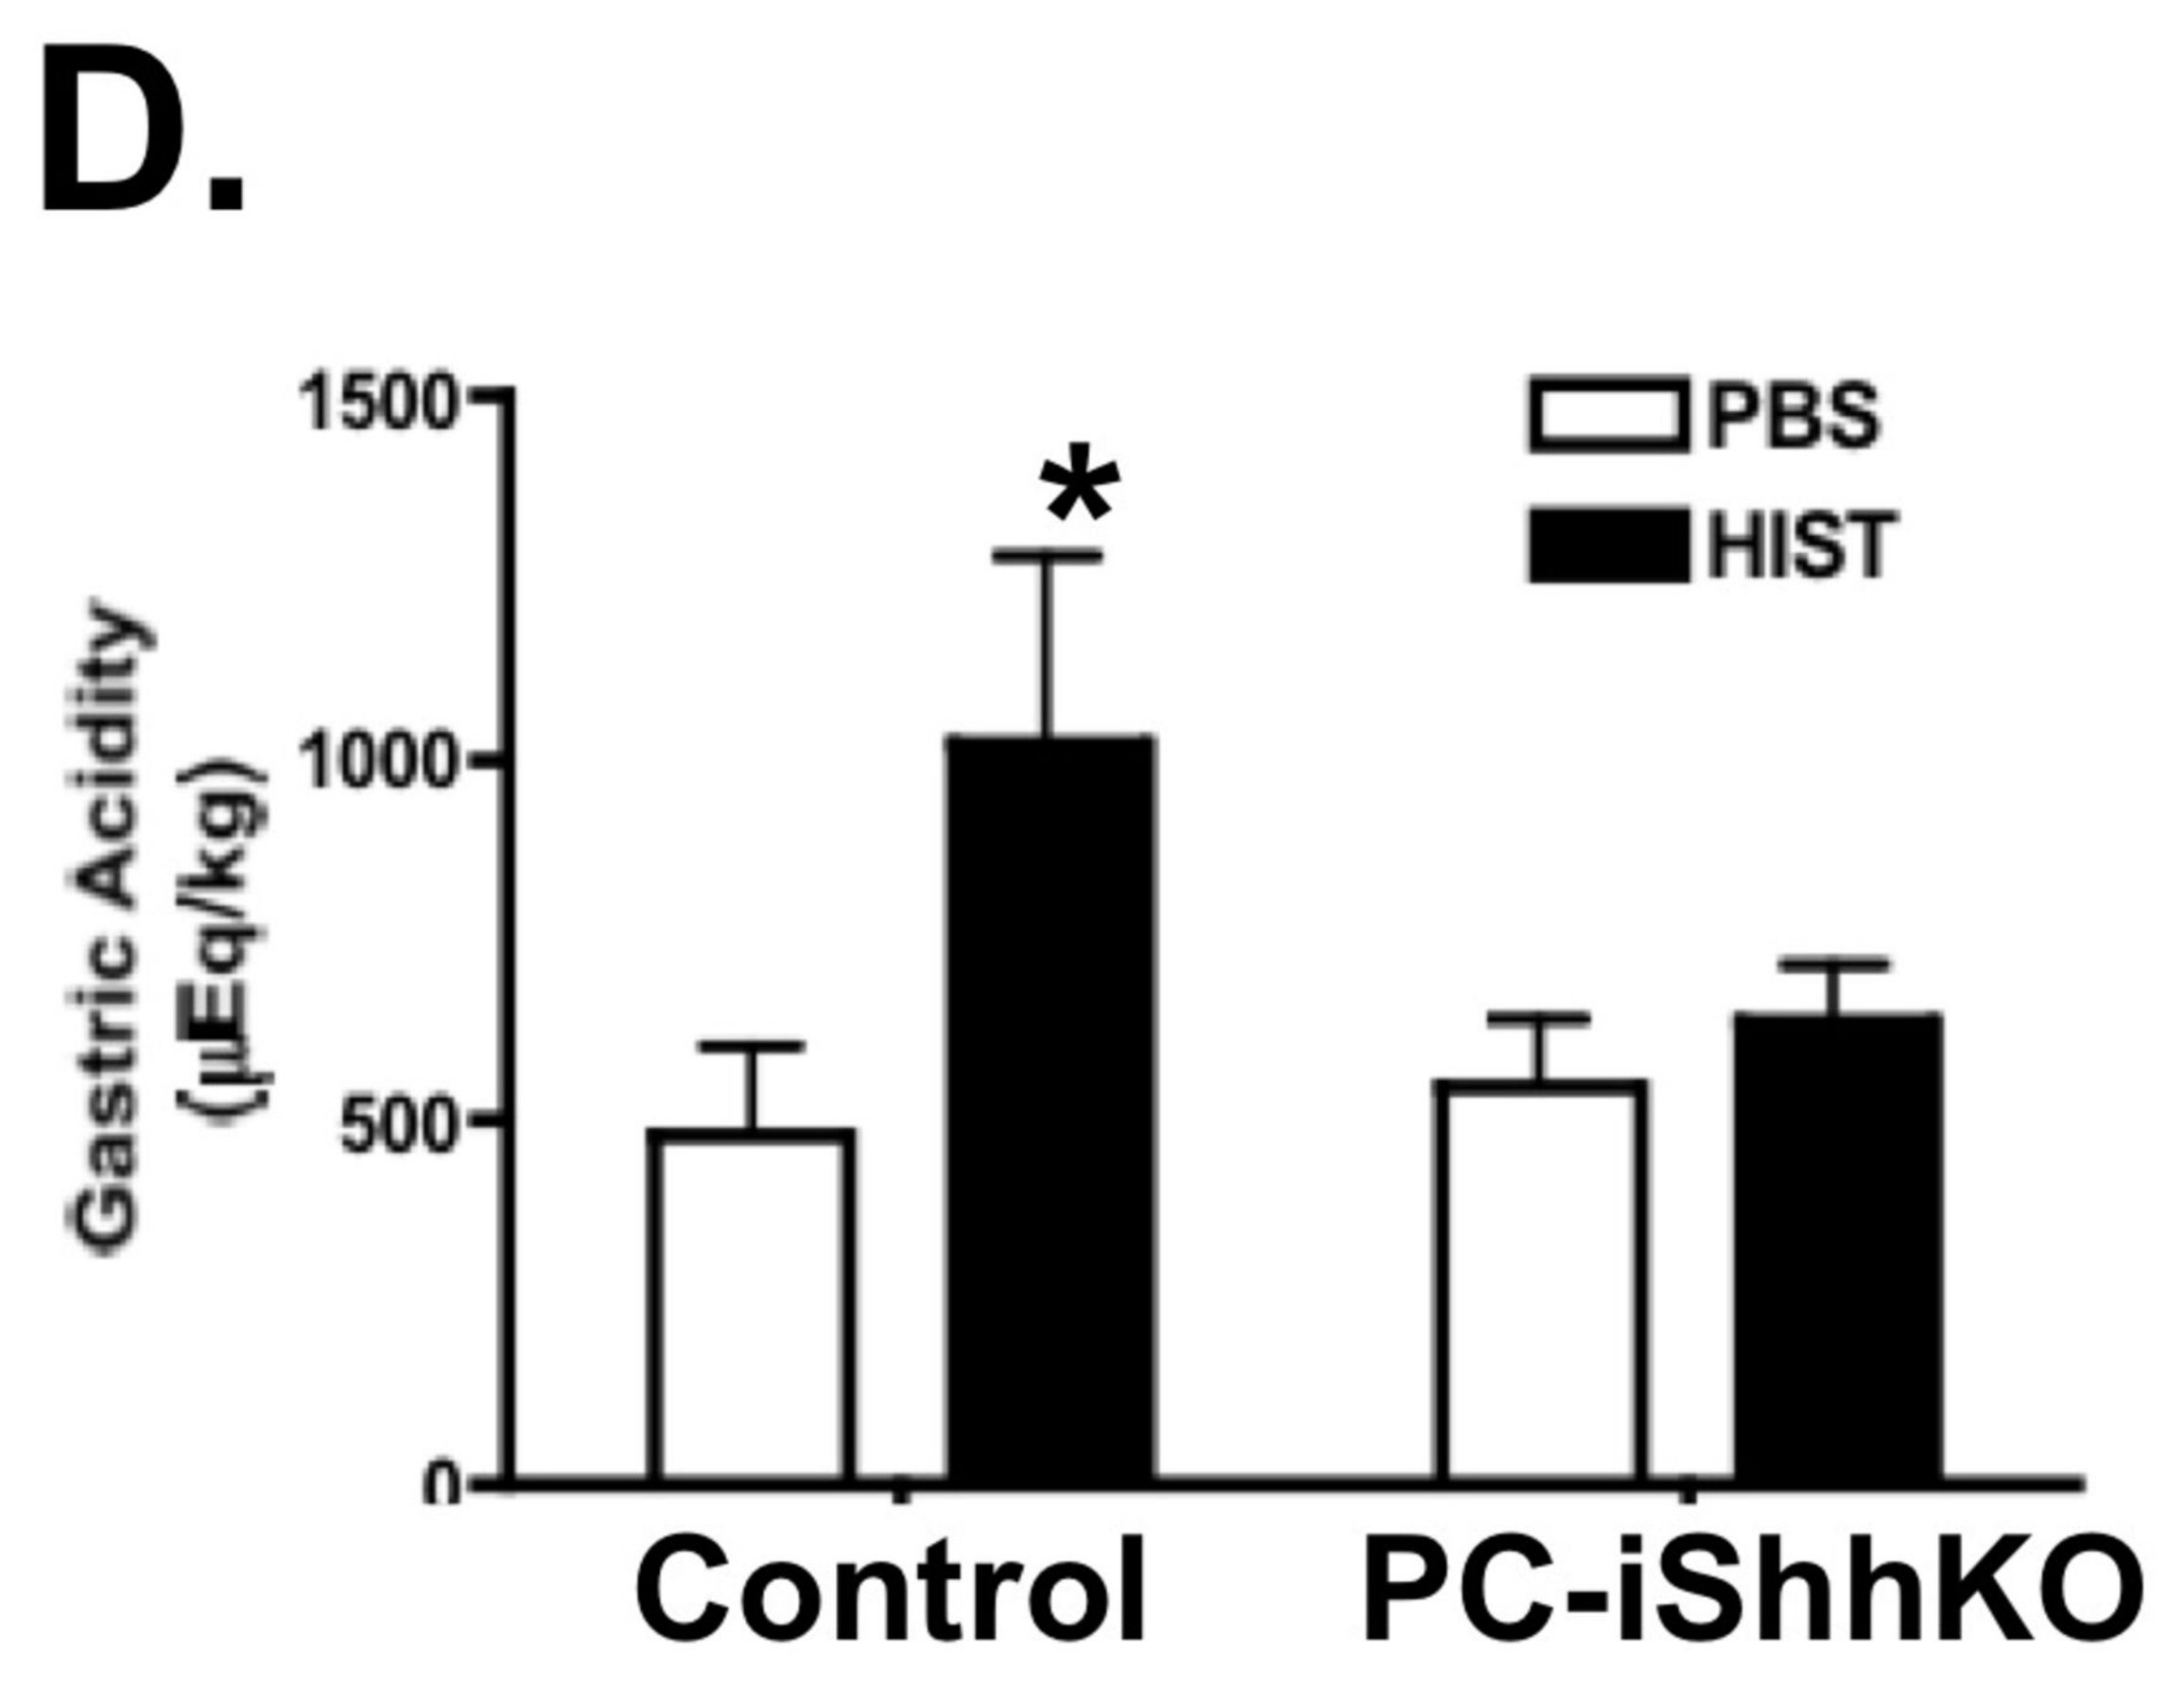

**A. Control**

**Day 1**

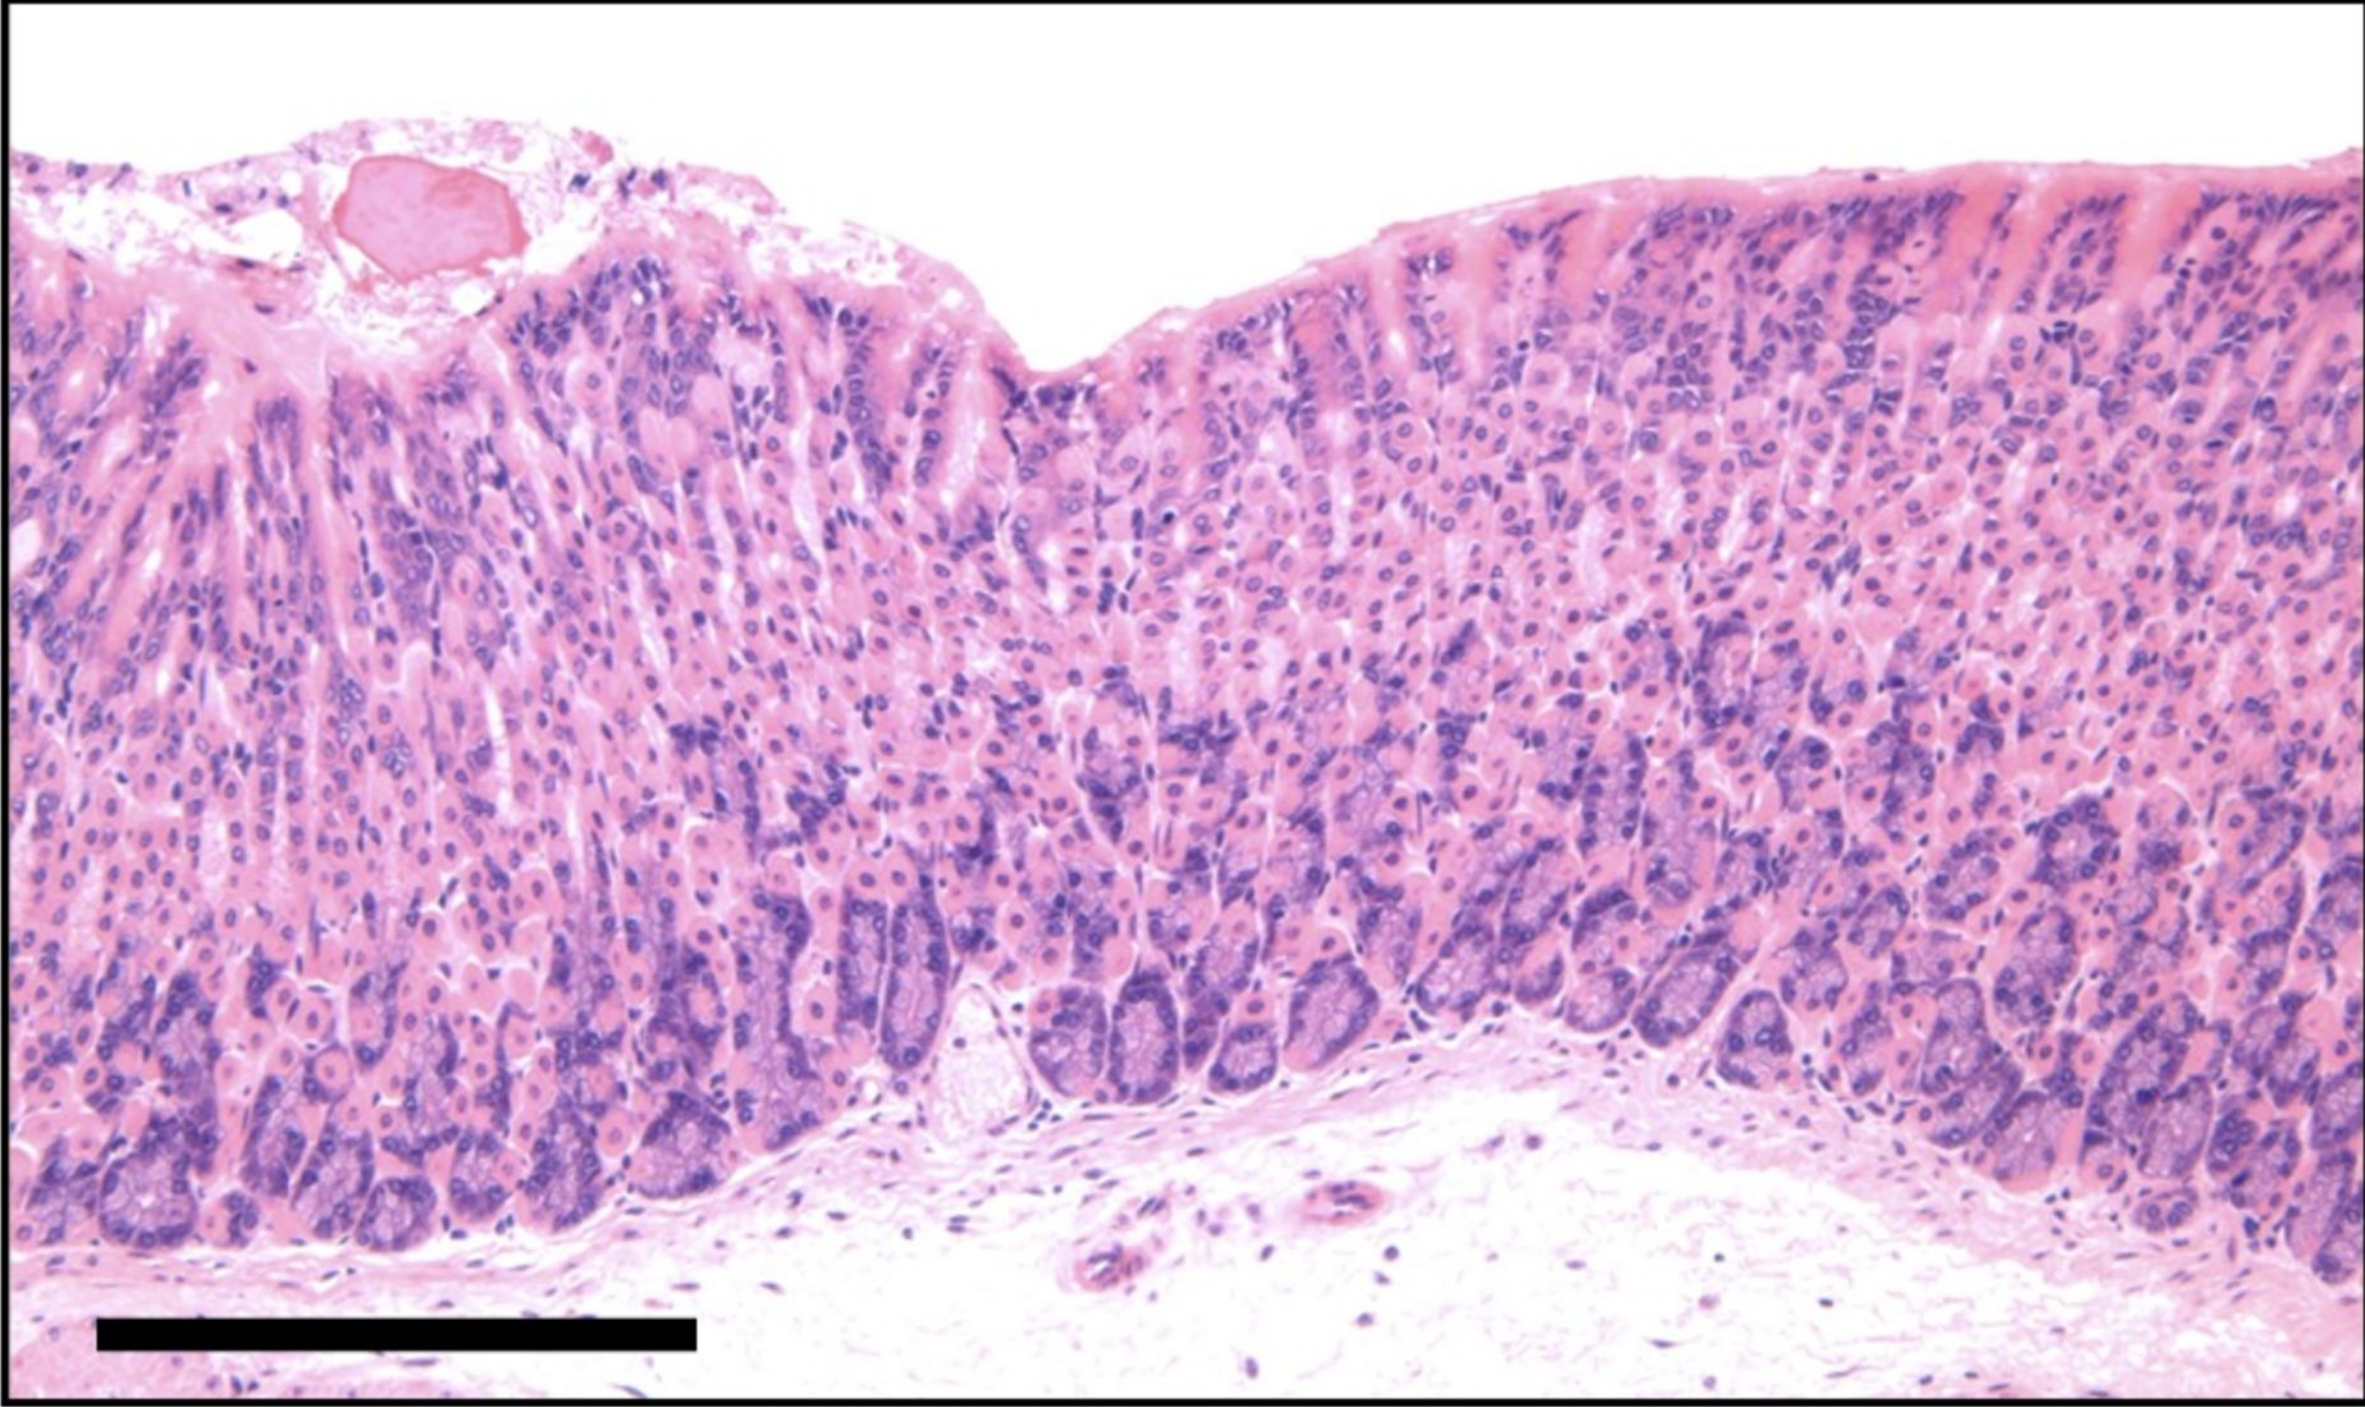

**B. Control**

**Day 7**

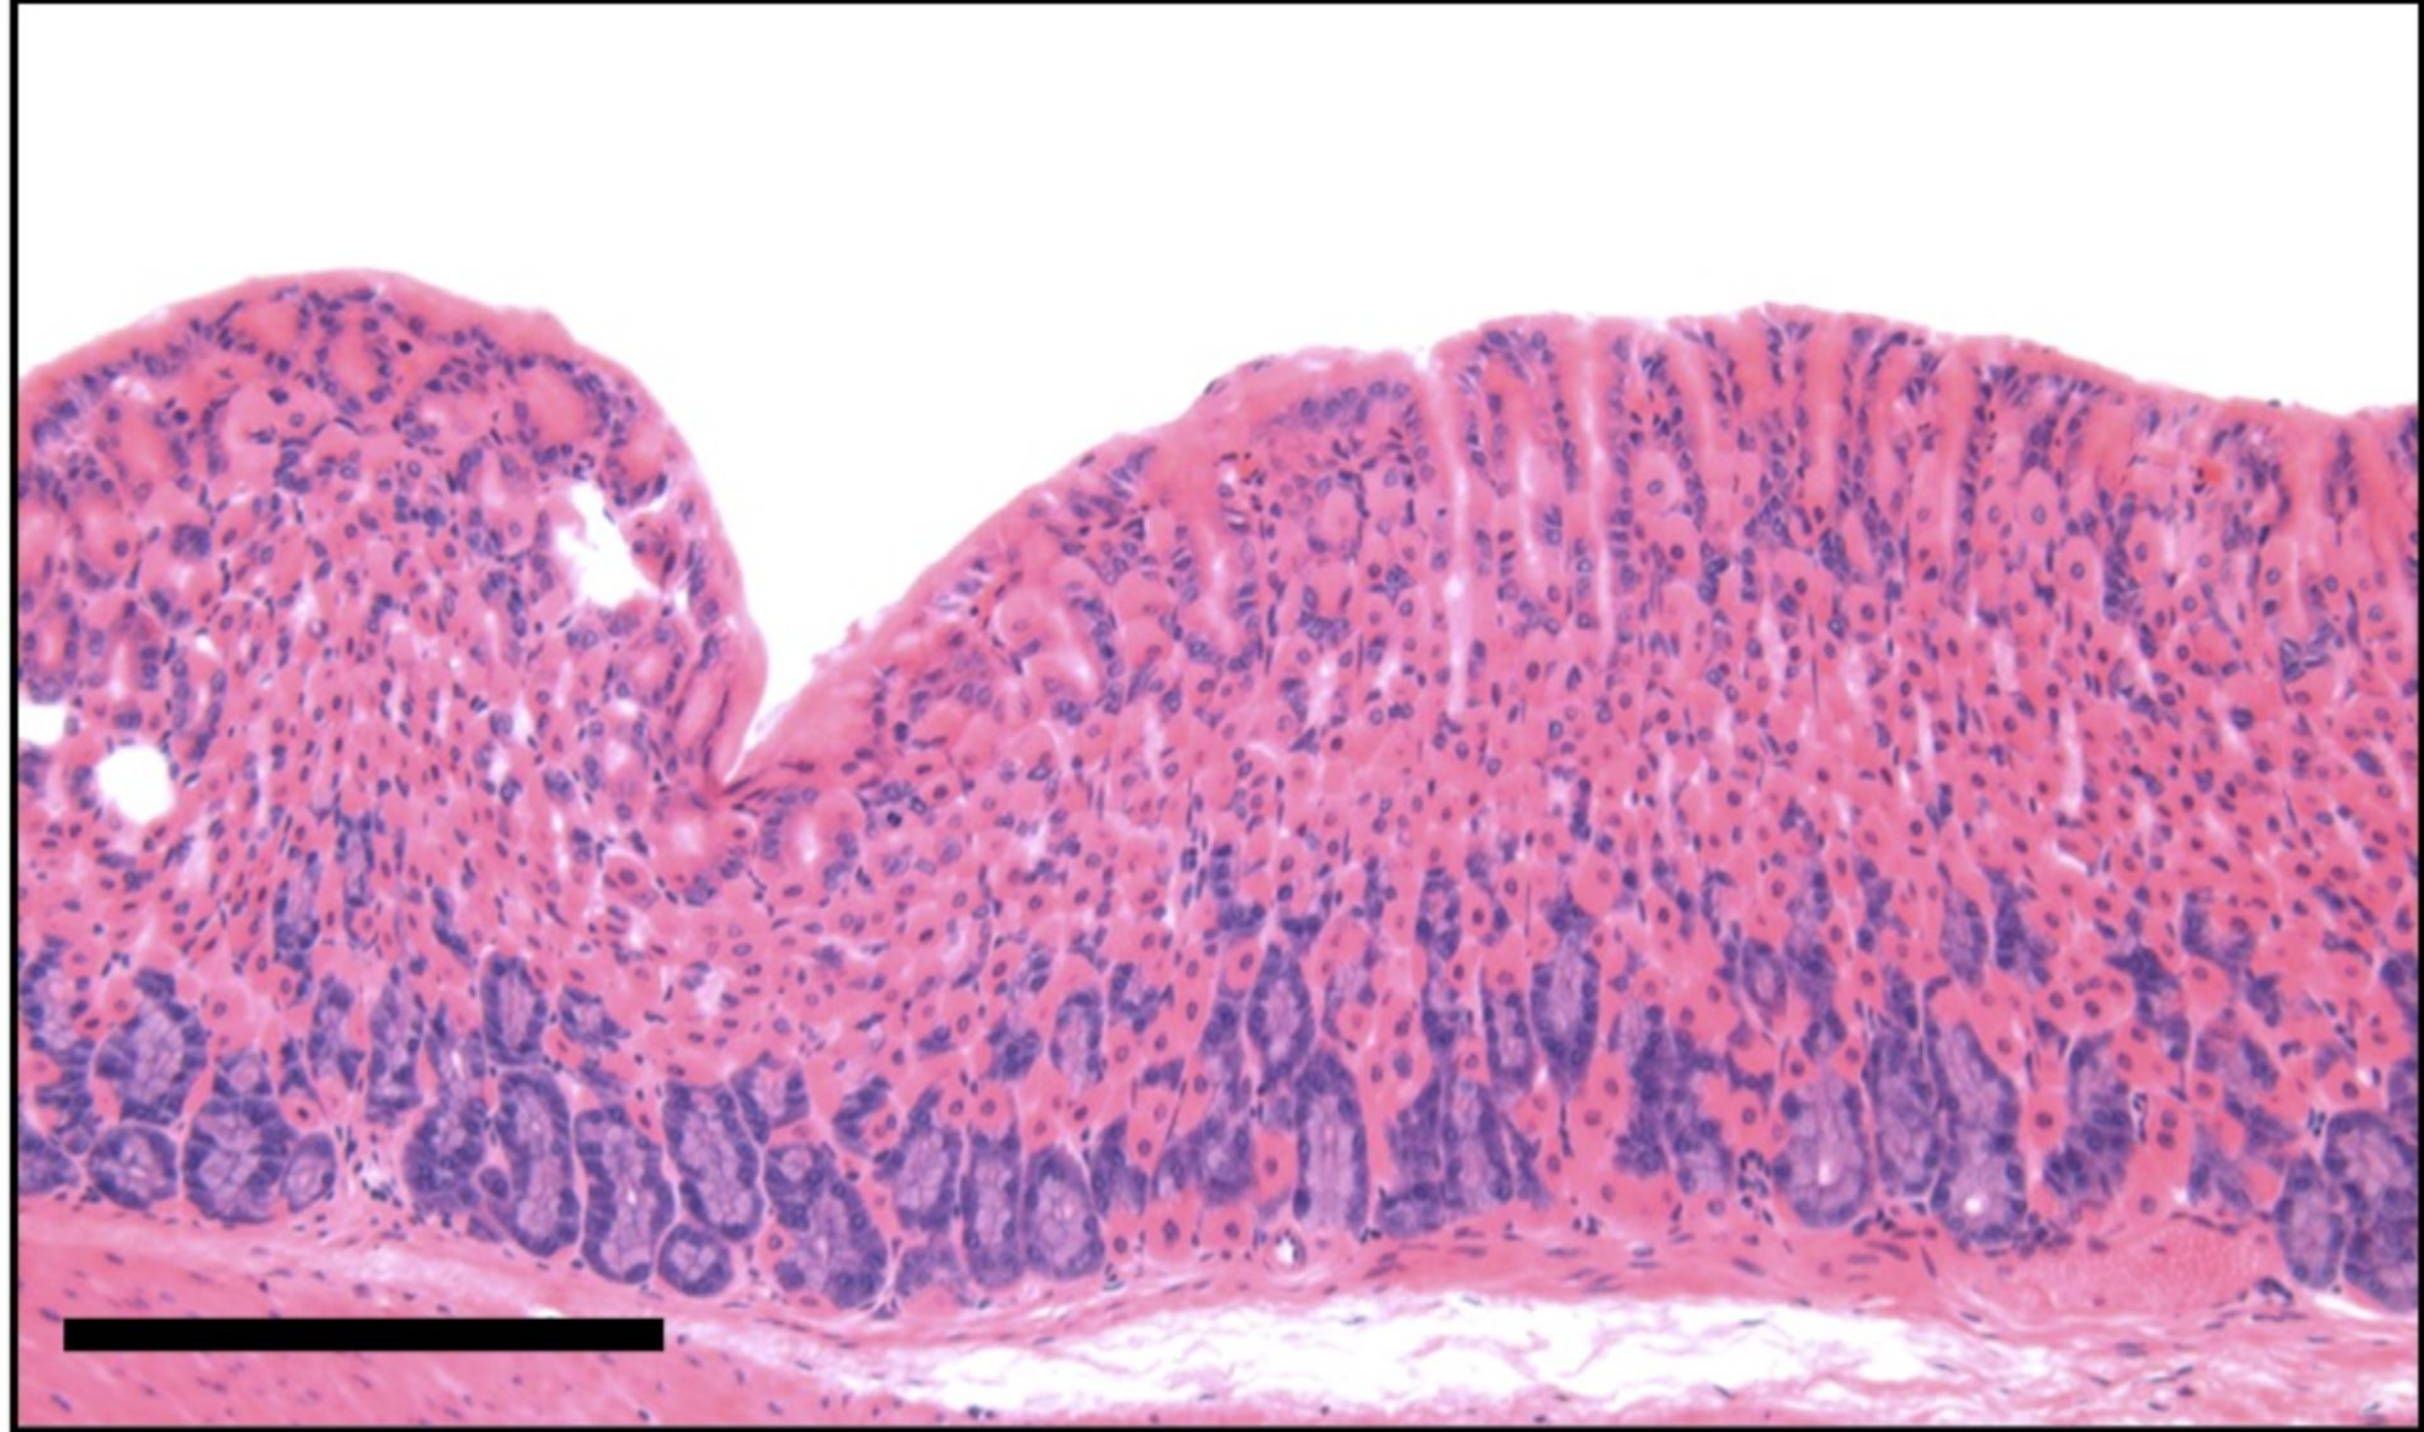

**C. PC-iShhKO**

**Day 1**

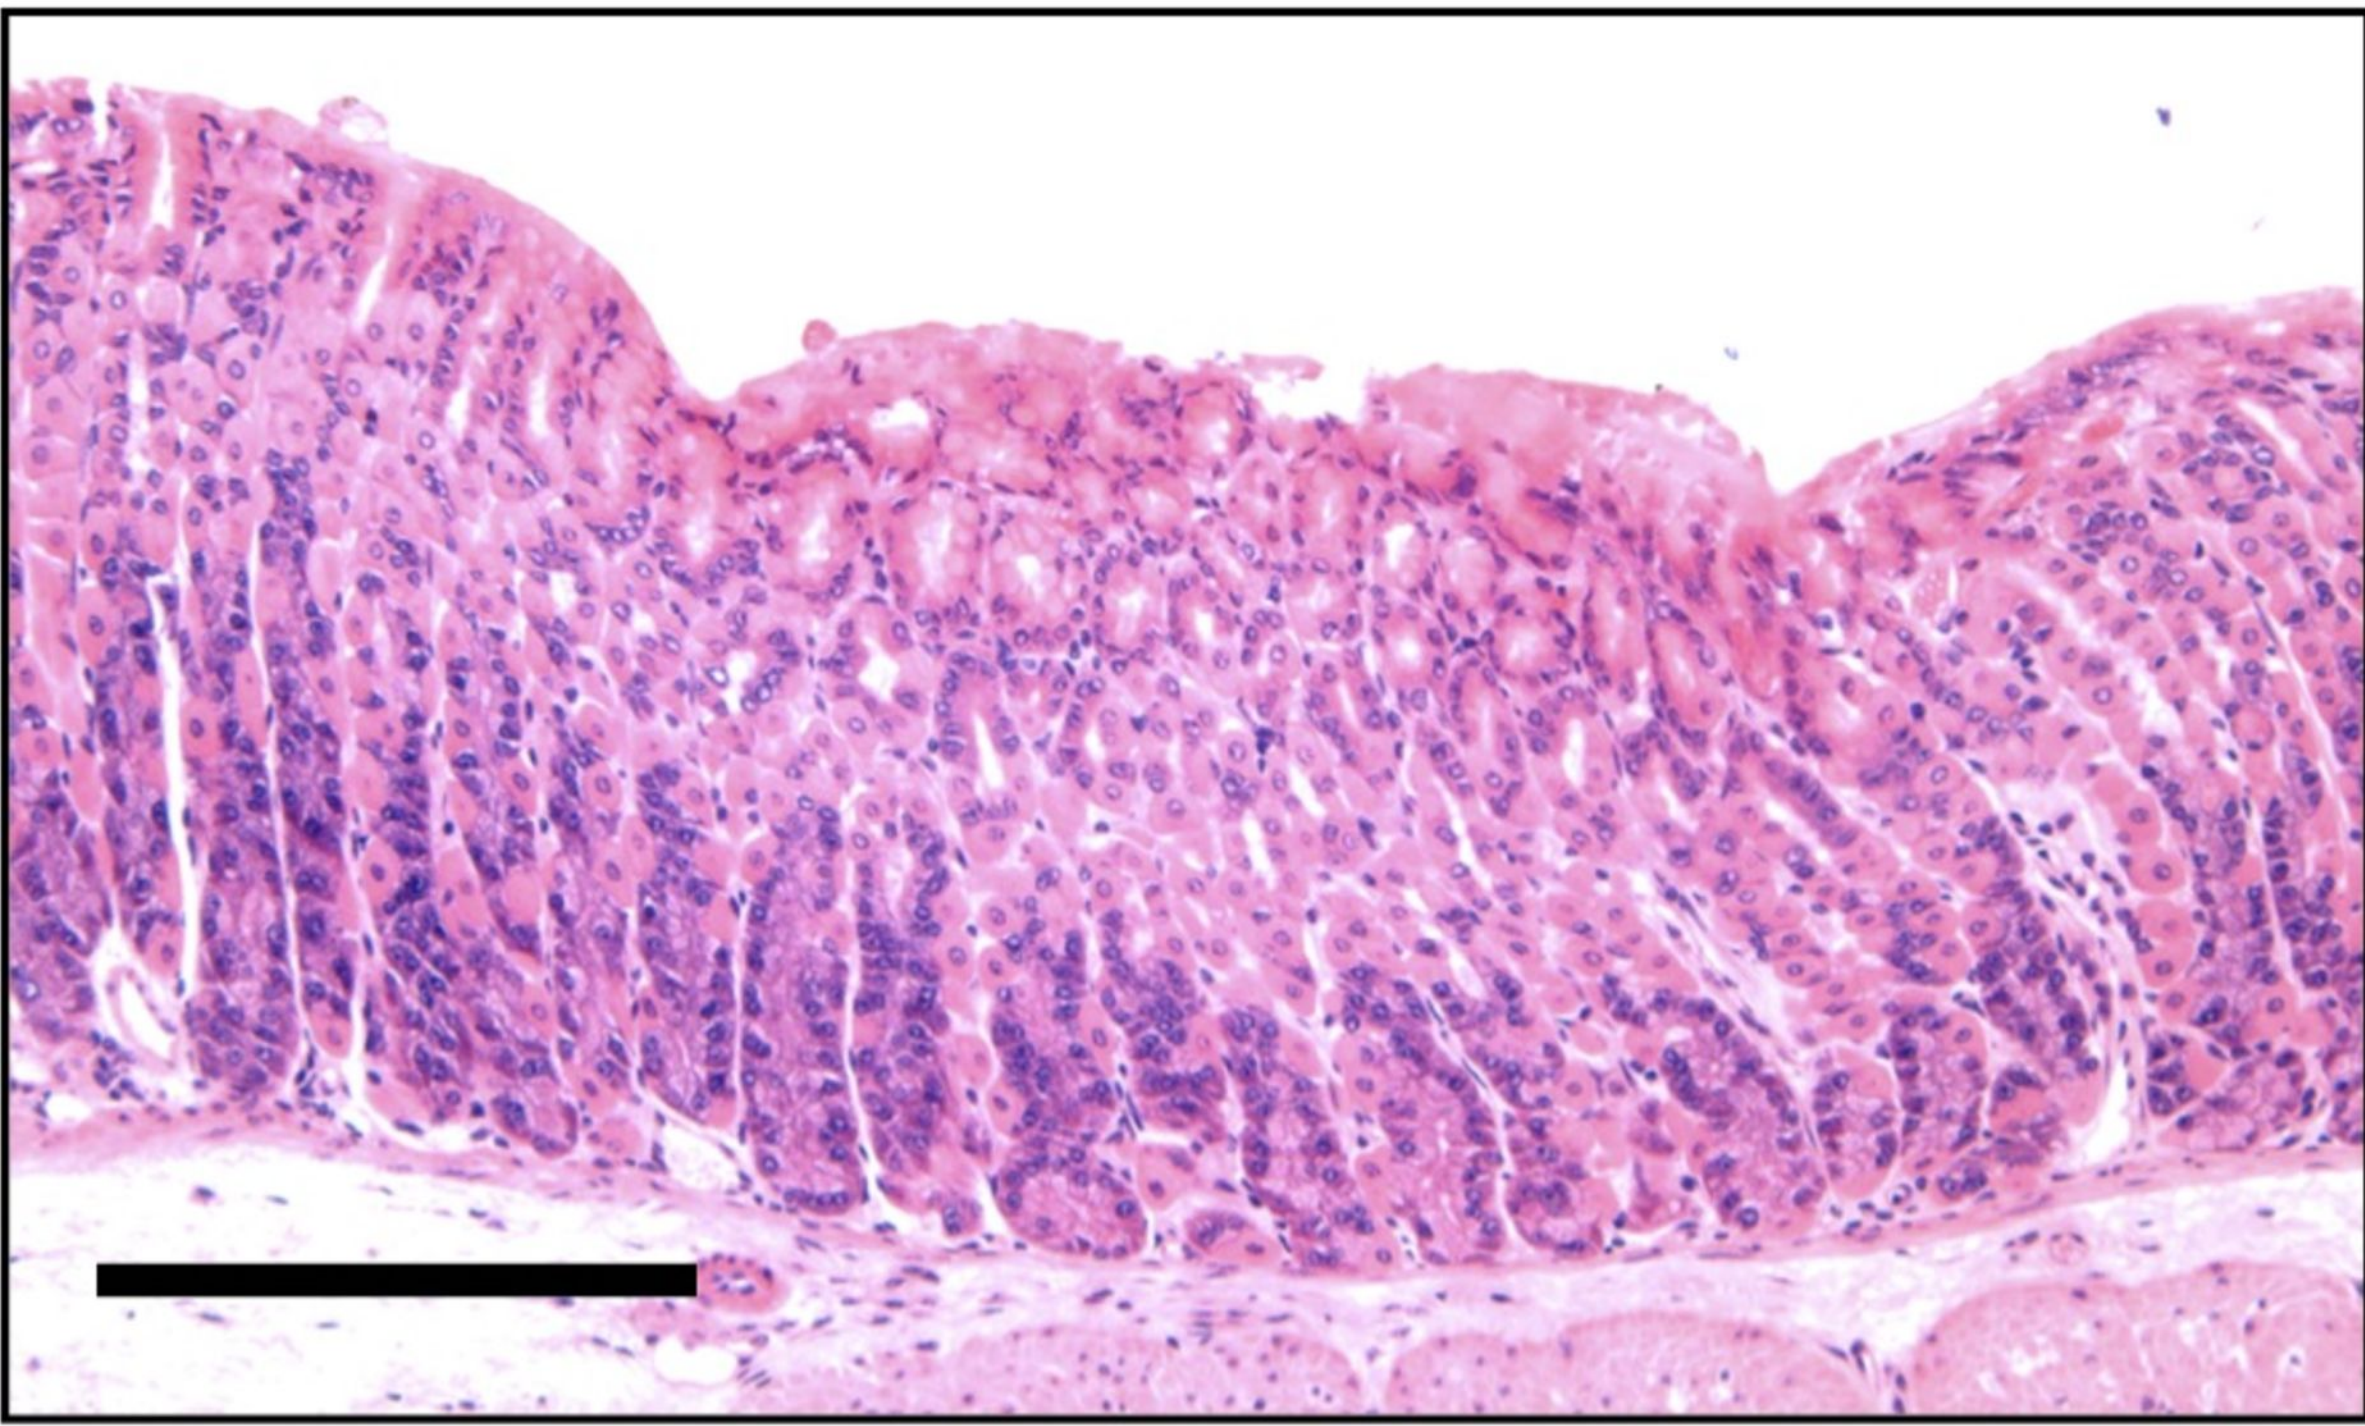

**D. PC-iShhKO**

**Day 7**

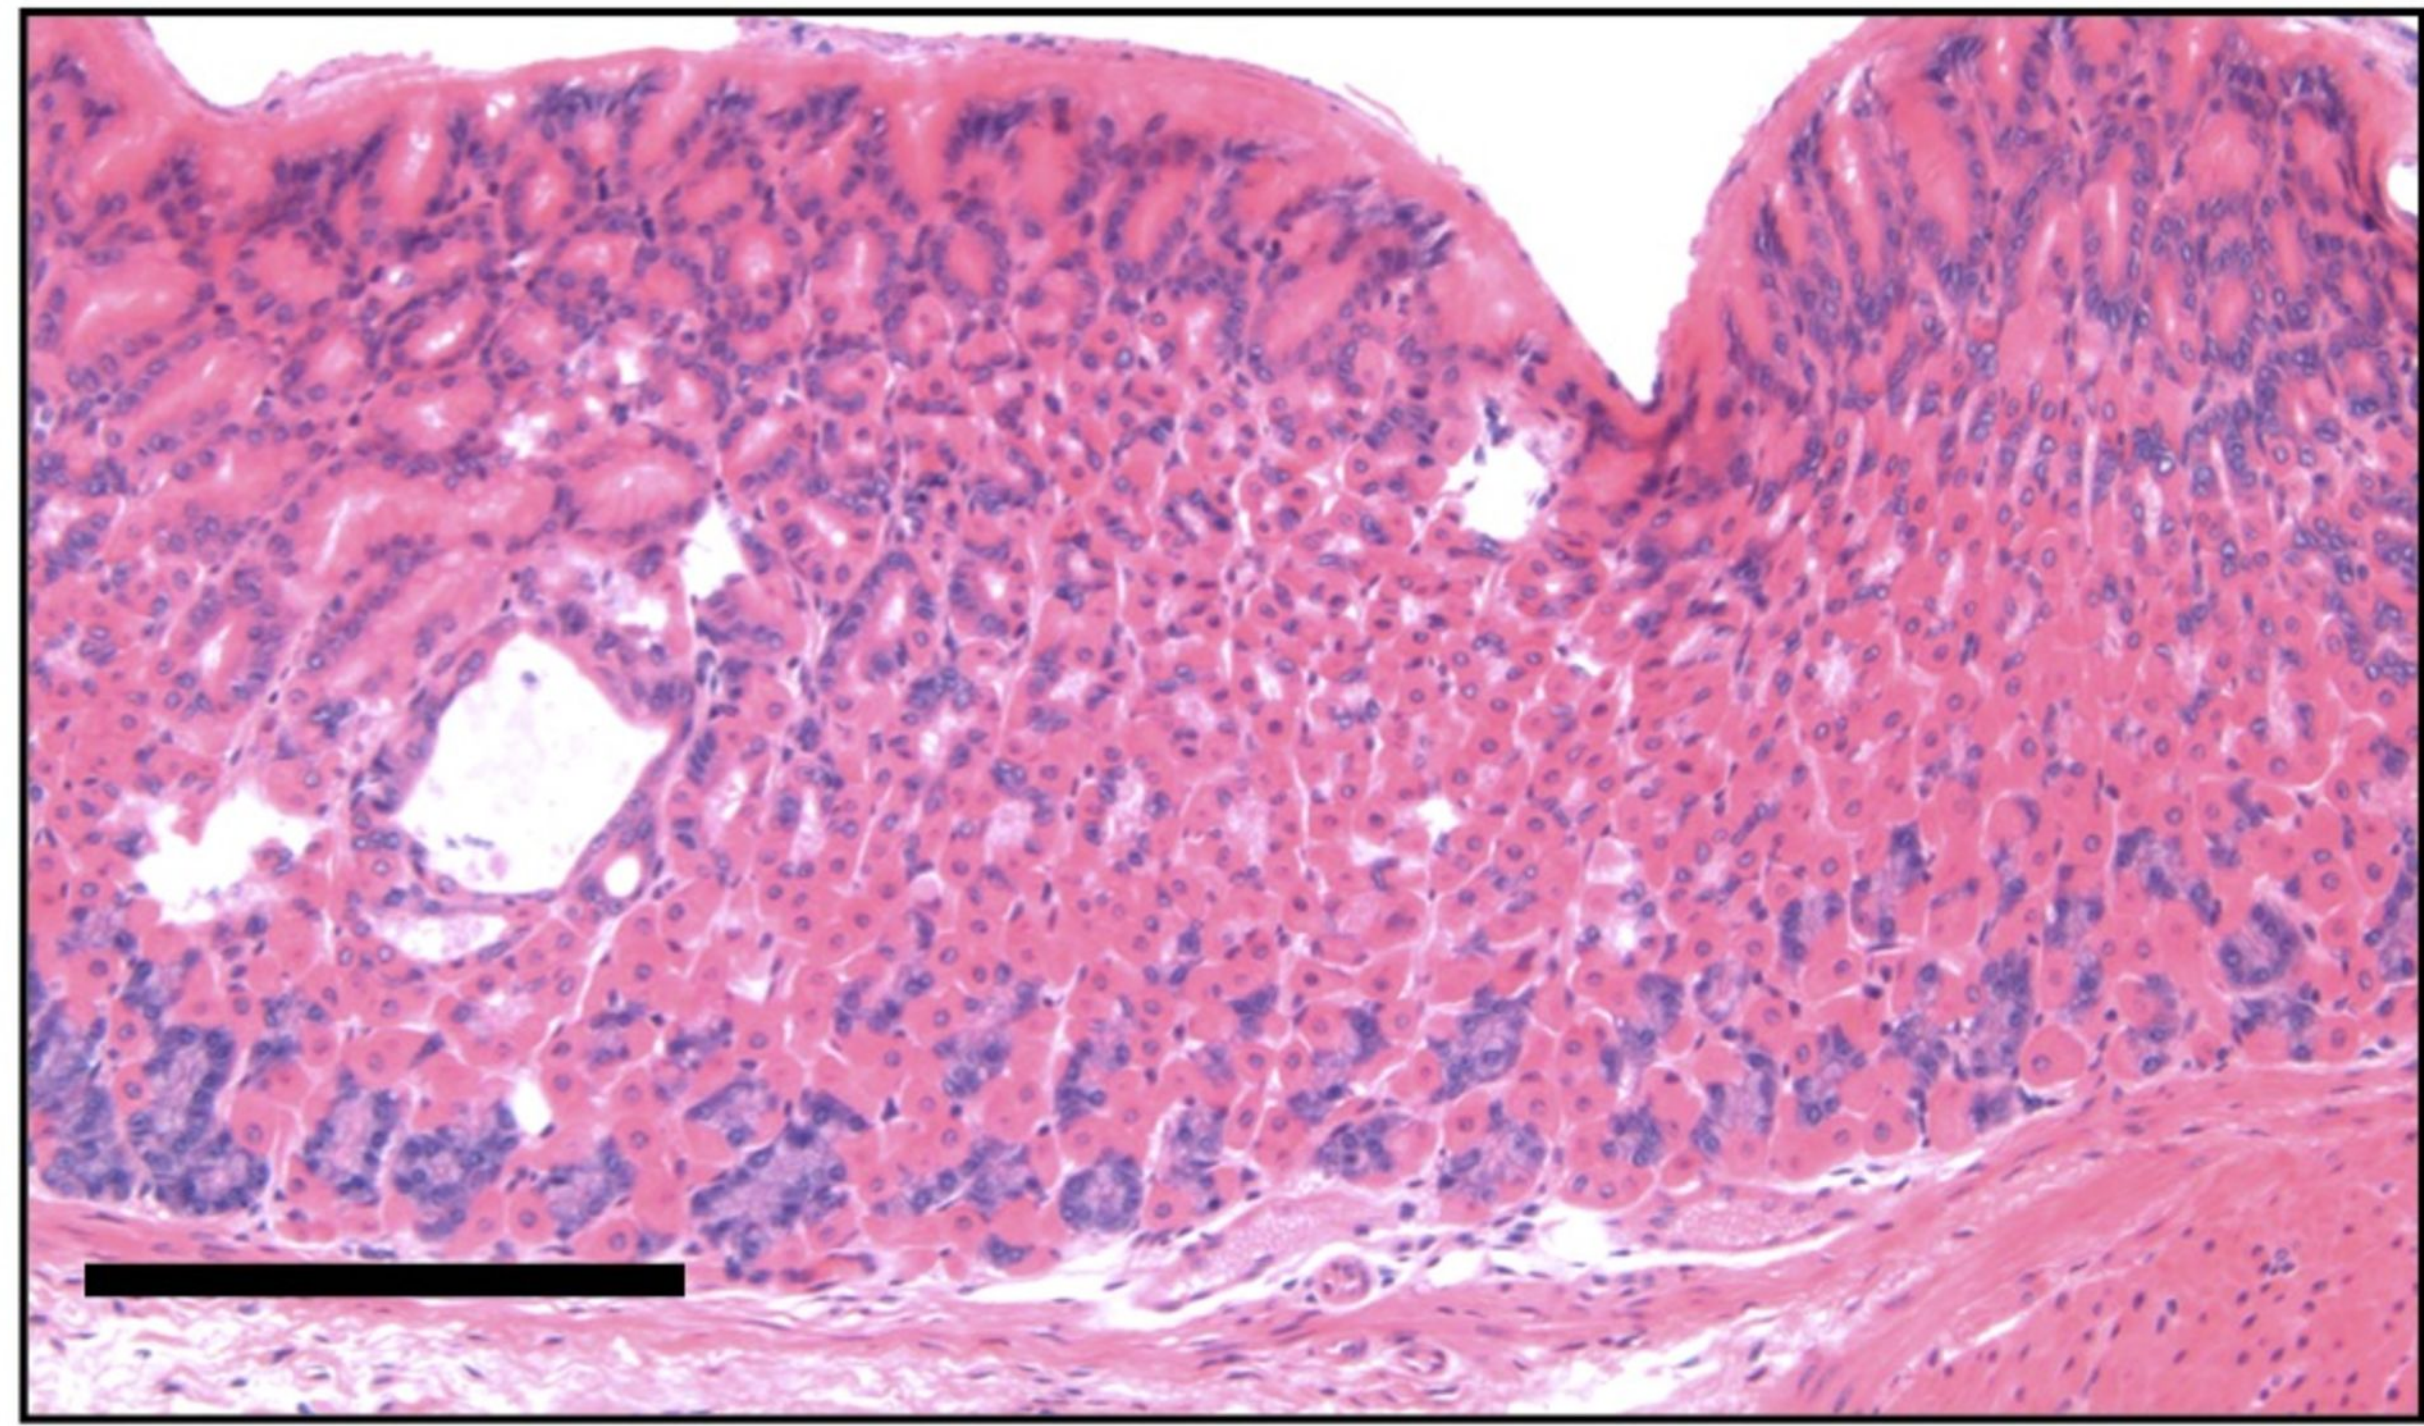

Supplement: NIHMS490593-supplement-01.pdf [file NIHMS490593-supplement-01.pdf]
